# Supplementary material for: Synthesis, characterization, antimicrobial, cytotoxic and carbonic anhydrase inhibition activities of multifunctional pyrazolo-1,2-benzothiazine acetamides
Source: publisher site journal article supplement (doi:10.3762/bjoc.21.25), 2025-02-12
Supplement: Additional file 1 [file 1860-5397-21-25-S1.pdf]

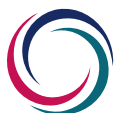

## Supporting Information

for

### **Synthesis, characterization, antimicrobial, cytotoxic and carbonic anhydrase inhibition activities of multifunctional pyrazolo-1,2-benzothiazine acetamides**

Ayesha Saeed, Shahana Ehsan, Muhammad Zia-ur-Rehman, Erin M. Marshall, Sandra Loesgen, Abdus Saleem, Simone Giovannuzzi and Claudiu T. Supuran

*Beilstein J. Org. Chem.* **2025**, *21*, 348–357. [doi:10.3762/bjoc.21.25](https://doi.org/10.3762/bjoc.21.25)

### **Experimental procedures, spectra (NMR, HRMS) and graphs of antimicrobial and cytotoxic assays**

## Table of contents

| Sr. #      | Contents                                                                                                        | Page #    |
|------------|-----------------------------------------------------------------------------------------------------------------|-----------|
| <b>1</b>   | <b>Experimental procedures</b>                                                                                  | <b>S3</b> |
| 1.1        | Synthesis of methyl (1,1-dioxido-3-oxo-1,2-benzisothiazol-2(3 <i>H</i> )-yl)acetate ( <b>2</b> )                | S3        |
| 1.2        | Synthesis of methyl 4-hydroxy-2 <i>H</i> -1,2-benzothiazine-3-carboxylate 1,1-dioxide ( <b>3</b> )              | S3        |
| 1.3        | Synthesis of methyl 4-hydroxy-2-methyl-2 <i>H</i> -benzo[e][1,2]thiazine-3-carboxylate 1,1-dioxide ( <b>4</b> ) | S3        |
| 1.4        | Synthesis of 2-chloro- <i>N</i> -aryl/benzyl/cyclohexylacetamides <b>6a–n</b>                                   | S4        |
| <b>2</b>   | <b>Spectra of pyrazolo-1,2-benzothiazine acetamides 7a–n</b>                                                    | <b>S4</b> |
| Figure S1  | <sup>1</sup> H NMR spectrum of compound <b>7a</b> in DMSO-d <sub>6</sub>                                        | S4        |
| Figure S2  | <sup>13</sup> C NMR spectrum of compound <b>7a</b> in DMSO-d <sub>6</sub>                                       | S5        |
| Figure S3  | HRMS of compound <b>7a</b>                                                                                      | S5        |
| Figure S4  | <sup>1</sup> H NMR spectrum of compound <b>7b</b> in DMSO-d <sub>6</sub>                                        | S6        |
| Figure S5  | <sup>13</sup> C NMR spectrum of compound <b>7b</b> in DMSO-d <sub>6</sub>                                       | S6        |
| Figure S6  | HRMS of compound <b>7b</b>                                                                                      | S7        |
| Figure S7  | <sup>1</sup> H NMR spectrum of compound <b>7c</b> in DMSO-d <sub>6</sub>                                        | S7        |
| Figure S8  | <sup>13</sup> C NMR spectrum of compound <b>7c</b> in DMSO-d <sub>6</sub>                                       | S8        |
| Figure S9  | HRMS of compound <b>7c</b>                                                                                      | S8        |
| Figure S10 | <sup>1</sup> H NMR spectrum of compound <b>7d</b> in DMSO-d <sub>6</sub>                                        | S9        |
| Figure S11 | <sup>13</sup> C NMR spectrum of compound <b>7d</b> in DMSO-d <sub>6</sub>                                       | S9        |
| Figure S12 | HRMS of compound <b>7d</b>                                                                                      | S10       |
| Figure S13 | <sup>1</sup> H NMR spectrum of compound <b>7e</b> in DMSO-d <sub>6</sub>                                        | S10       |
| Figure S14 | <sup>13</sup> C NMR spectrum of compound <b>7e</b> in DMSO-d <sub>6</sub>                                       | S11       |
| Figure S15 | HRMS of compound <b>7e</b>                                                                                      | S11       |
| Figure S16 | <sup>1</sup> H NMR spectrum of compound <b>7f</b> in DMSO-d <sub>6</sub>                                        | S12       |
| Figure S17 | <sup>13</sup> C NMR spectrum of compound <b>7f</b> in DMSO-d <sub>6</sub>                                       | S12       |
| Figure S18 | HRMS of compound <b>7f</b>                                                                                      | S13       |
| Figure S19 | <sup>1</sup> H NMR spectrum of compound <b>7g</b> in DMSO-d <sub>6</sub>                                        | S13       |
| Figure S20 | <sup>13</sup> C NMR spectrum of compound <b>7g</b> in DMSO-d <sub>6</sub>                                       | S14       |
| Figure S21 | HRMS of compound <b>7g</b>                                                                                      | S14       |
| Figure S22 | <sup>1</sup> H NMR spectrum of compound <b>7h</b> in DMSO-d <sub>6</sub>                                        | S15       |
| Figure S23 | <sup>13</sup> C NMR spectrum of compound <b>7h</b> in DMSO-d <sub>6</sub>                                       | S15       |
| Figure S24 | HRMS of compound <b>7h</b>                                                                                      | S16       |

|            |                                                                                                       |            |
|------------|-------------------------------------------------------------------------------------------------------|------------|
| Figure S25 | <sup>1</sup> H NMR spectrum of compound <b>7i</b> in DMSO-d <sub>6</sub>                              | S16        |
| Figure S26 | <sup>13</sup> C NMR spectrum of compound <b>7i</b> in DMSO-d <sub>6</sub>                             | S17        |
| Figure S27 | HRMS of compound <b>7i</b>                                                                            | S17        |
| Figure S28 | <sup>1</sup> H NMR spectrum of compound <b>7j</b> in DMSO-d <sub>6</sub>                              | S18        |
| Figure S29 | <sup>13</sup> C NMR spectrum of compound <b>7j</b> in DMSO-d <sub>6</sub>                             | S18        |
| Figure S30 | HRMS of compound <b>7j</b>                                                                            | S19        |
| Figure S31 | <sup>1</sup> H NMR spectrum of compound <b>7k</b> in DMSO-d <sub>6</sub>                              | S19        |
| Figure S32 | <sup>13</sup> C NMR spectrum of compound <b>7k</b> in DMSO-d <sub>6</sub>                             | S20        |
| Figure S33 | HRMS of compound <b>7k</b>                                                                            | S20        |
| Figure S34 | <sup>1</sup> H NMR spectrum of compound <b>7l</b> in DMSO-d <sub>6</sub>                              | S21        |
| Figure S35 | <sup>13</sup> C NMR spectrum of compound <b>7l</b> in DMSO-d <sub>6</sub>                             | S21        |
| Figure S36 | HRMS of compound <b>7l</b>                                                                            | S22        |
| Figure S37 | <sup>1</sup> H NMR spectrum of compound <b>7m</b> in DMSO-d <sub>6</sub>                              | S22        |
| Figure S38 | <sup>13</sup> C NMR spectrum of compound <b>7m</b> in DMSO-d <sub>6</sub>                             | S23        |
| Figure S39 | HRMS of compound <b>7m</b>                                                                            | S23        |
| Figure S40 | <sup>1</sup> H NMR spectrum of compound <b>7n</b> in DMSO-d <sub>6</sub>                              | S24        |
| Figure S41 | <sup>13</sup> C NMR spectrum of compound <b>7n</b> in DMSO-d <sub>6</sub>                             | S24        |
| Figure S42 | HRMS of compound <b>7n</b>                                                                            | S25        |
| Figure S43 | Graph showing results of antimicrobial single-dose microbroth assays of compounds <b>7a–n</b>         | S26        |
| Table S1   | Results of single-dose antimicrobial and cytotoxic assays for compounds <b>7a–n</b>                   | S27        |
| Figure S44 | Graph showing cytotoxicity of compounds <b>7a–n</b> against human colon carcinoma cell line (HCT-116) | S28        |
| <b>3</b>   | <b>Characterization data of compounds 7a–n</b>                                                        | <b>S27</b> |
|            | <b>References</b>                                                                                     | <b>S34</b> |

## 1. Experimental procedures

### 1.1 Synthesis of methyl 2-(1,1-dioxido-3-oxo-1,2-benzisothiazol-2(3*H*)-yl)acetate (2)

Saccharine sodium (5.125 g, 25 mmol) was dissolved in DMF (30 mL) and methyl chloroacetate (2.712 g, 25 mmol) was added after the complete dissolution of saccharine sodium. The reaction mixture was stirred at 90–110 °C for 3–4 hours. After the completion of the reaction, the reaction mixture was allowed to cool to room temperature. Now the flask contents were poured into ice-cold water. White precipitates of methyl 2-(1,1-dioxido-3-oxobenzo[*d*]isothiazol-2(3*H*)-yl)acetate (2) were formed which were filtered, washed with excess of water and then recrystallized from ethanol [1,2]. M.P: 116-117°C, Yield: 5.487 g (86%).

### 1.2 Synthesis of methyl 4-hydroxy-2*H*-benzo[*e*][1,2]thiazine-3-carboxylate 1,1-dioxide (3)

Fresh sodium methoxide (1.350 g, 25 mmol) was prepared using sodium metal and dry methanol (30 mL) as solvent. A solution of compound 2 (2.550 g, 10 mmol) in dry DMSO was prepared separately. Both of these solutions were prepared under moisture-free conditions. Then these two solutions were mixed at room temperature and swirled well until a dark orange red color was obtained. Then, the contents of the reaction mixture were poured over the mixture of ice and concentrated hydrochloric acid having pH 3. Keep on stirring while pouring the reaction mixture. White colored precipitates of methyl 4-hydroxy-2*H*-benzo[*e*][1,2]thiazine-3-carboxylate 1,1-dioxide (3) were formed, which were then filtered, washed with excess water, dried and recrystallized using ethanol [1,2]. M.P: 171-172°C, Yield: 1.531 g (60%).

### 1.3 Synthesis of methyl 4-hydroxy-2-methyl-2*H*-benzo[*e*][1,2]thiazine-3-carboxylate 1,1-dioxide (4)

Compound 3 (5.100 g, 20 mmoles) was dissolved in acetone (20 mL) and sodium hydroxide (2 N) was added slowly while stirring at room temperature to set the pH at 10–11. The reaction mixture was stirred for 5 minutes. Then, dimethyl sulfate (2.520 g, 20 mmol) was added drop-wise. This reaction mixture was further stirred for 40 minutes. After the completion of the reaction, it was acidified with dilute hydrochloric acid until the appearance of white precipitates of methyl 4-hydroxy-2-methyl-2*H*-benzo[*e*][1,2]thiazine-3-carboxylate 1,1-dioxide (4). These were filtered, washed with water, dried and recrystallized with ethanol [3]. M.P 161-162°C, Yield: 3.822 g (71%).

#### 1.4 Synthesis of 2-chloro-*N*-aryl/benzyl/cyclohexylacetamides 6a–n

Aryl/benzyl/cyclohexylamines (5 mmol) were dissolved in DCM and Na<sub>2</sub>CO<sub>3</sub> solution (7%) was added dropwise to set the pH at 9.0. This reaction mixture was stirred for 30 minutes at room temperature. Then, chloroacetyl chloride (847 mg, 7.5 mmol) in 2 mL DCM was added drop-wise in about 10–15 min with vigorous stirring. Stirring was continued until the precipitation of solid 2-chloro-*N*-aryl/benzyl/cyclohexylacetamides **6a–n**. After the completion of the reaction, precipitates were filtered, washed with chilled distilled water, and dried to produce the desired alkylating agents [4].

#### 2. Spectra of pyrazolo-1,2-benzothiazine acetamides 7a–n

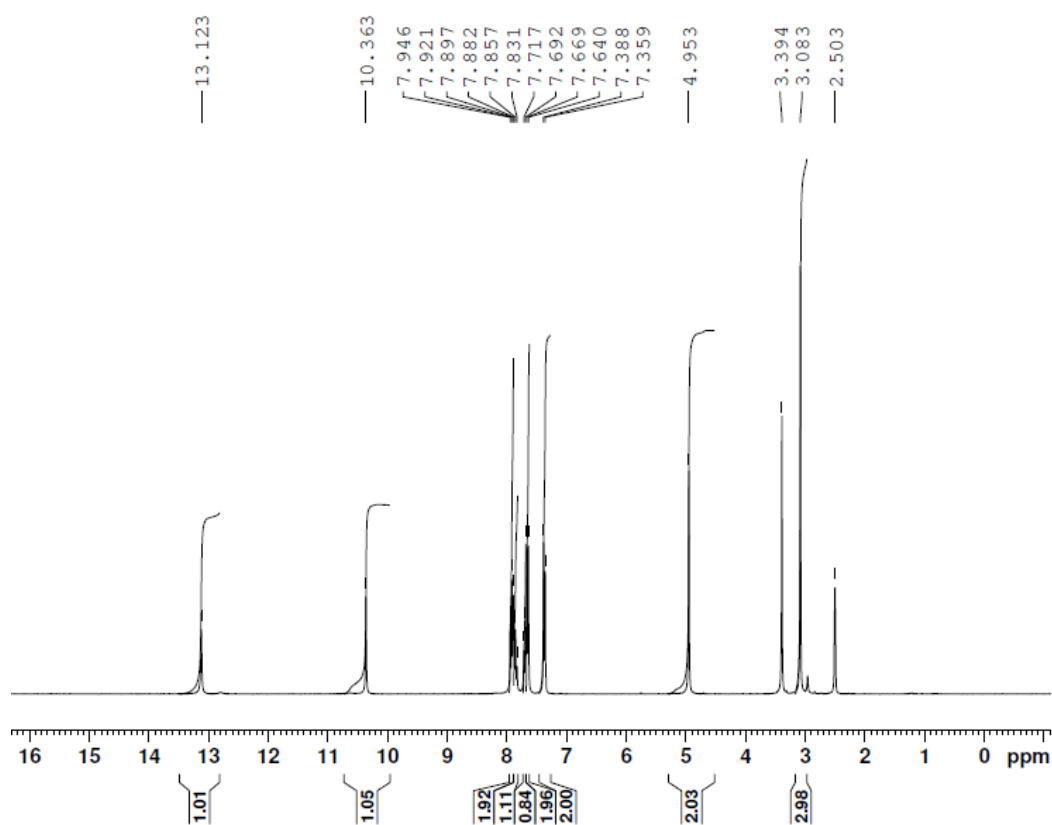

**Figure S1.** <sup>1</sup>H NMR of compound **7a** in DMSO-d<sub>6</sub> at 300 MHz.

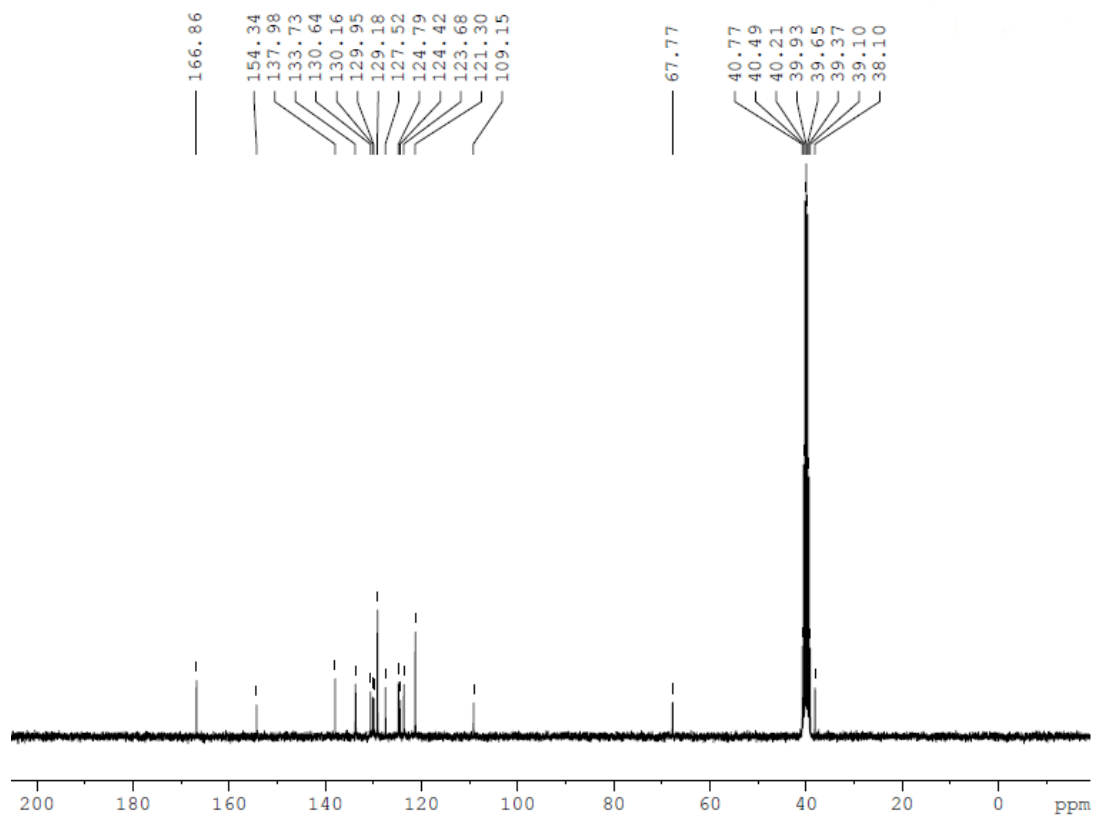

**Figure S2.**  $^{13}\text{C}$  NMR of compound **7a** in  $\text{DMSO-d}_6$  at 75 MHz.

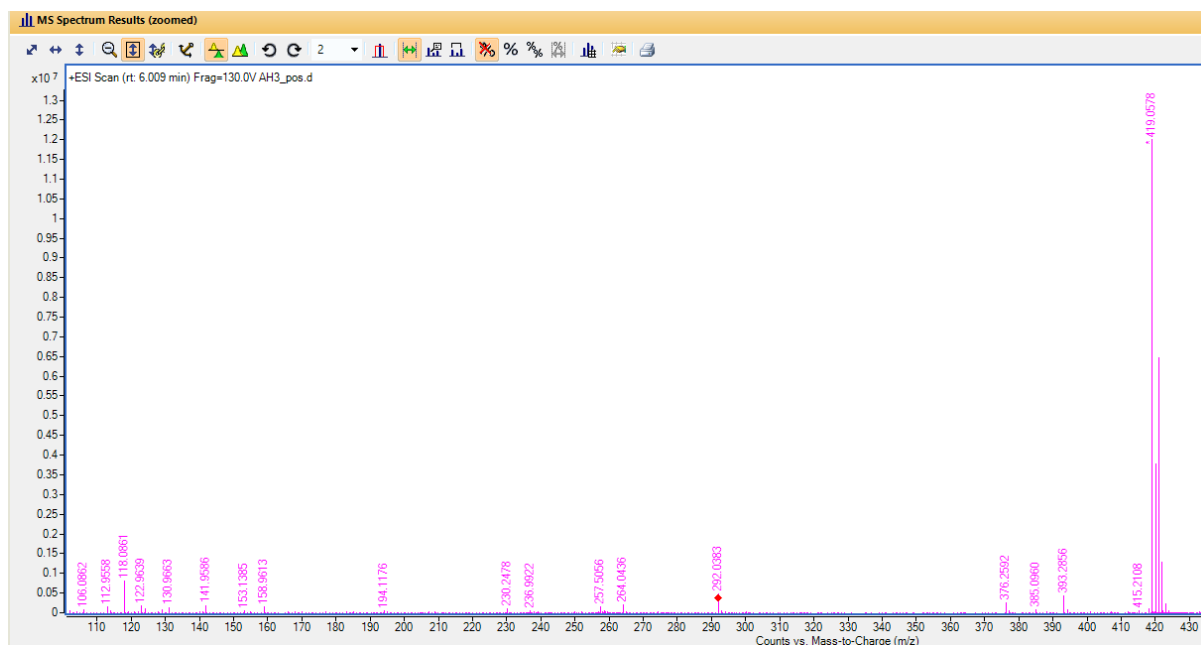

**Figure S3.** HRMS of compound **7a**.

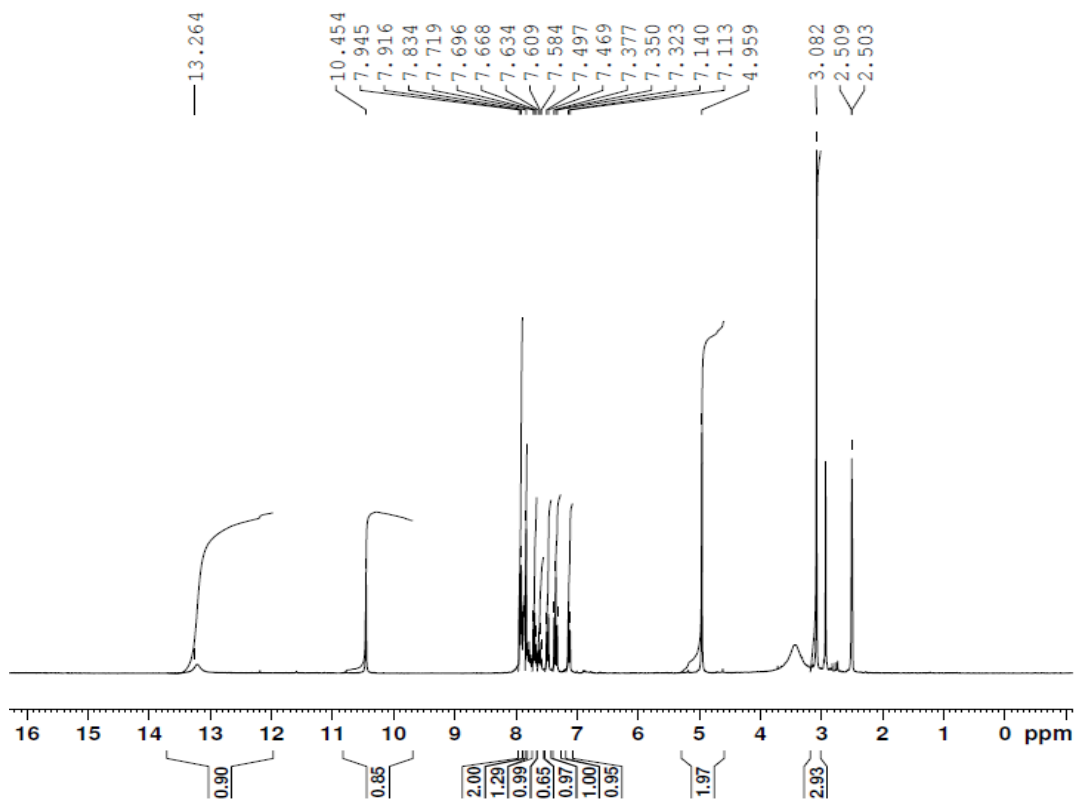

Figure S4.  $^1\text{H}$  NMR of compound **7b** in  $\text{DMSO-d}_6$  at 300 MHz.

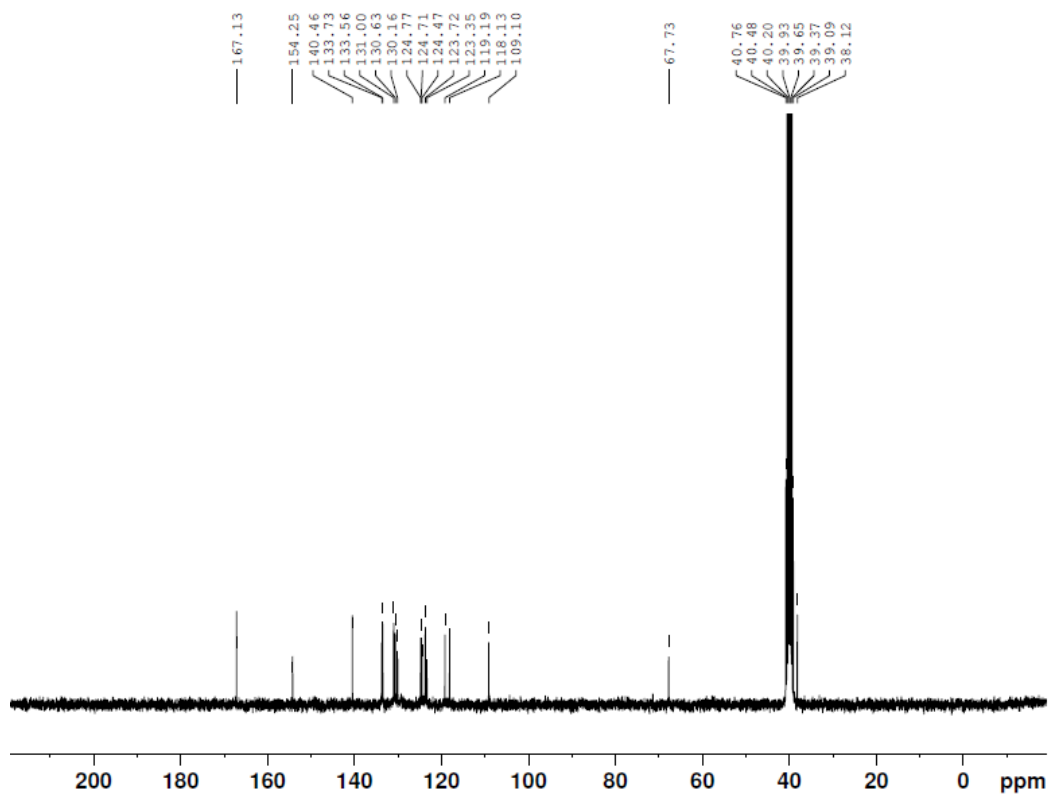

Figure S5.  $^{13}\text{C}$  NMR of compound **7b** in  $\text{DMSO-d}_6$  at 75 MHz.

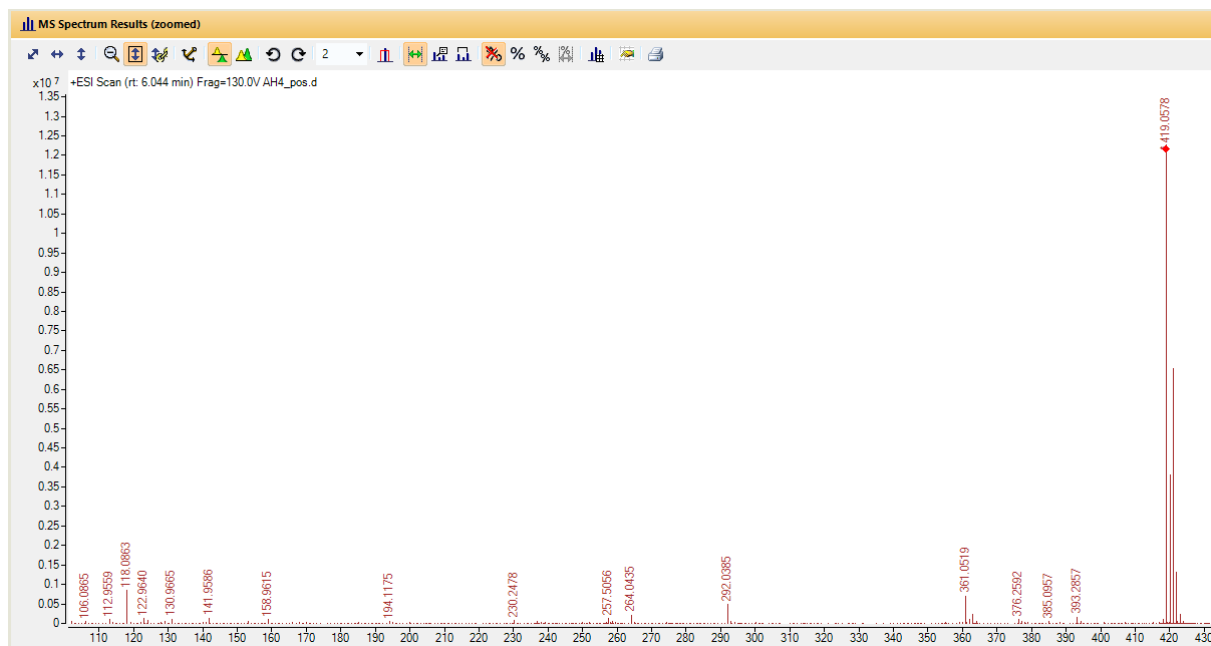

Figure S6. HRMS of compound **7b**.

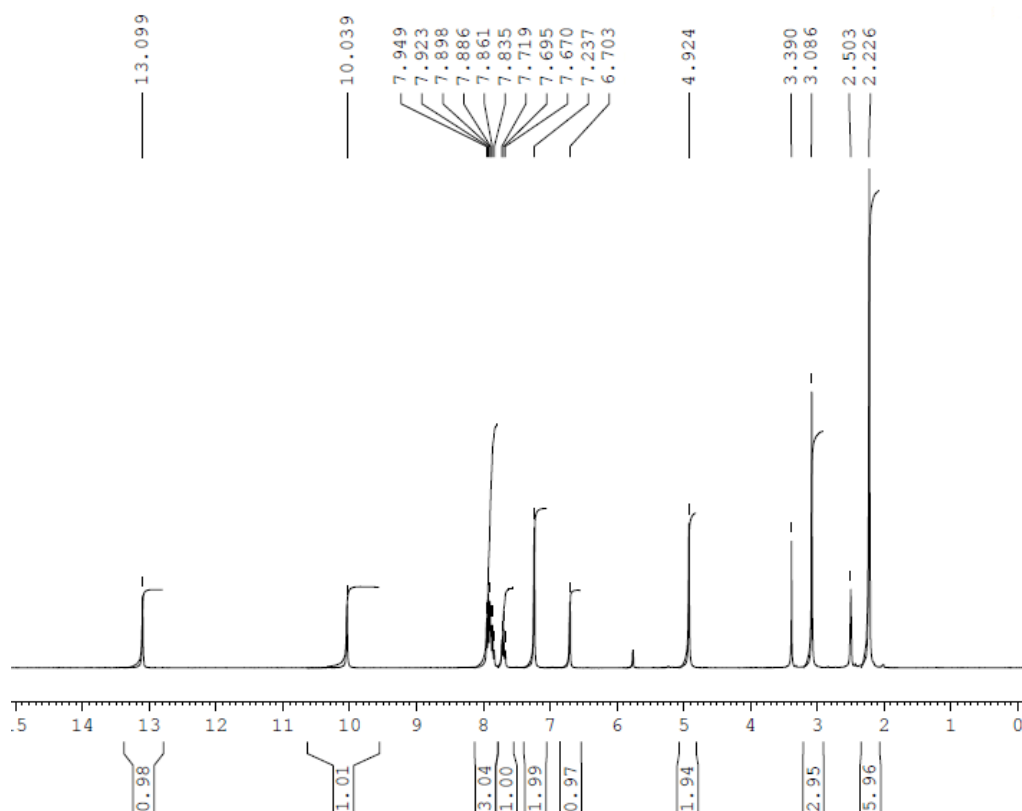

Figure S7.  $^1\text{H}$  NMR of compound **7c** in  $\text{DMSO-d}_6$  at 300 MHz.



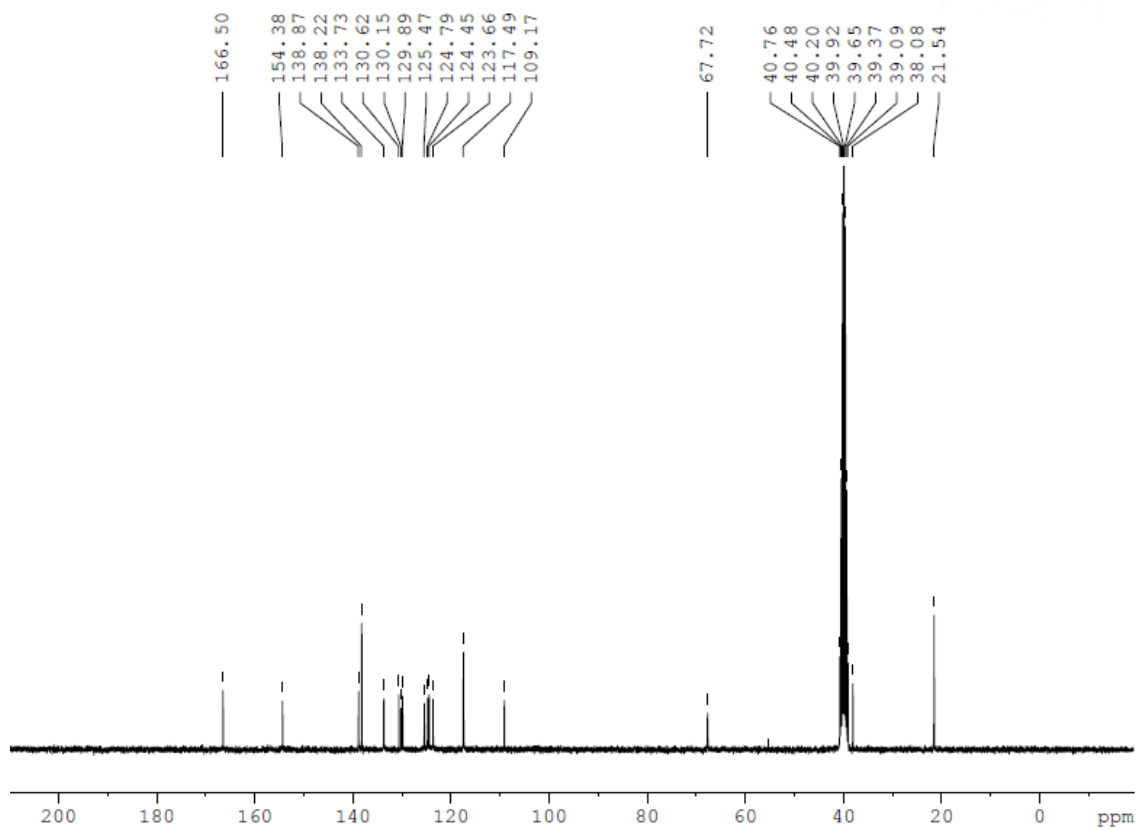

**Figure S8.**  $^{13}\text{C}$  NMR of compound **7c** in  $\text{DMSO-d}_6$  at 75 MHz.

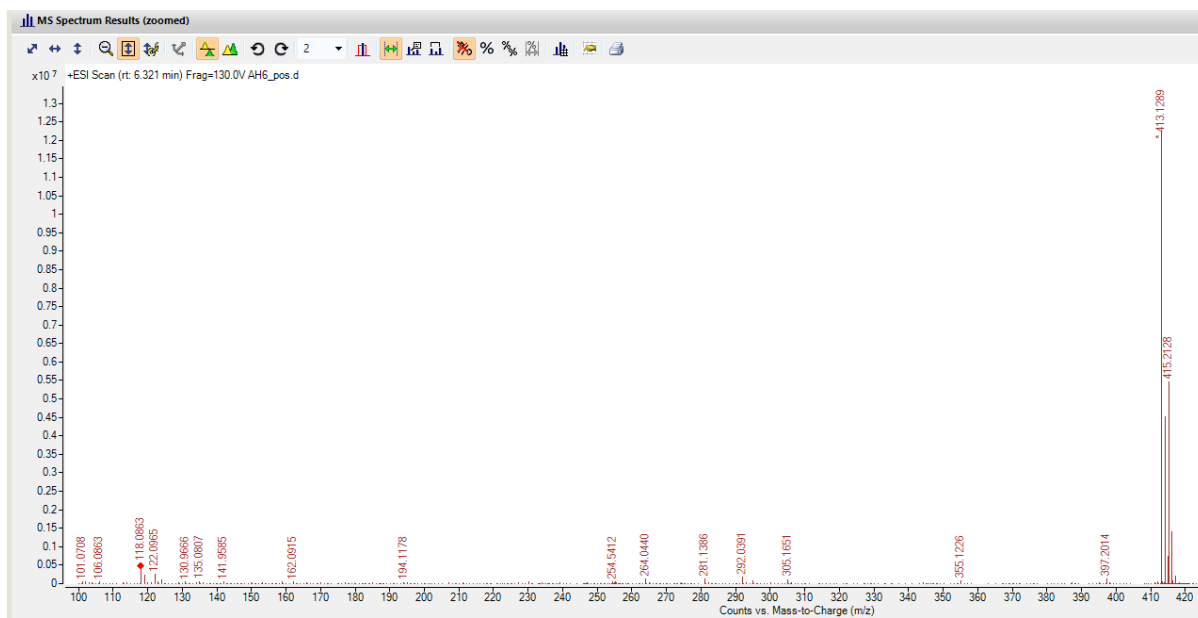

**Figure S9.** HRMS of compound **7c**.

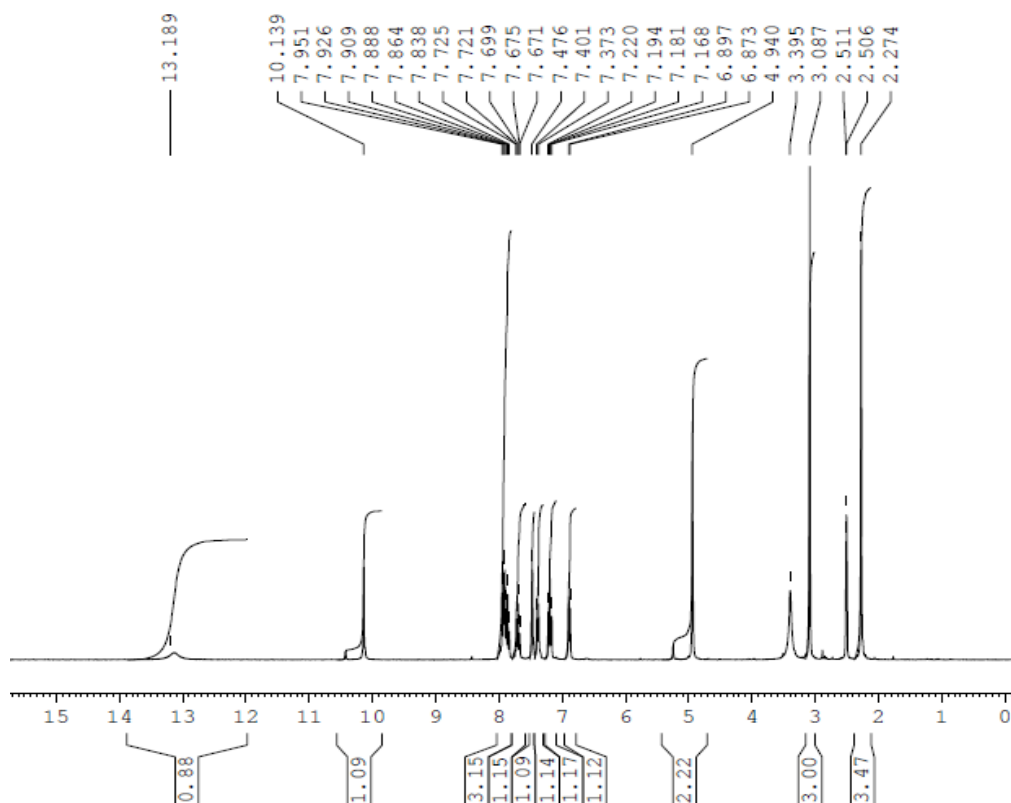

**Figure S10.**  $^1\text{H}$  NMR of compound **7d** in  $\text{DMSO-d}_6$  at 300 MHz.

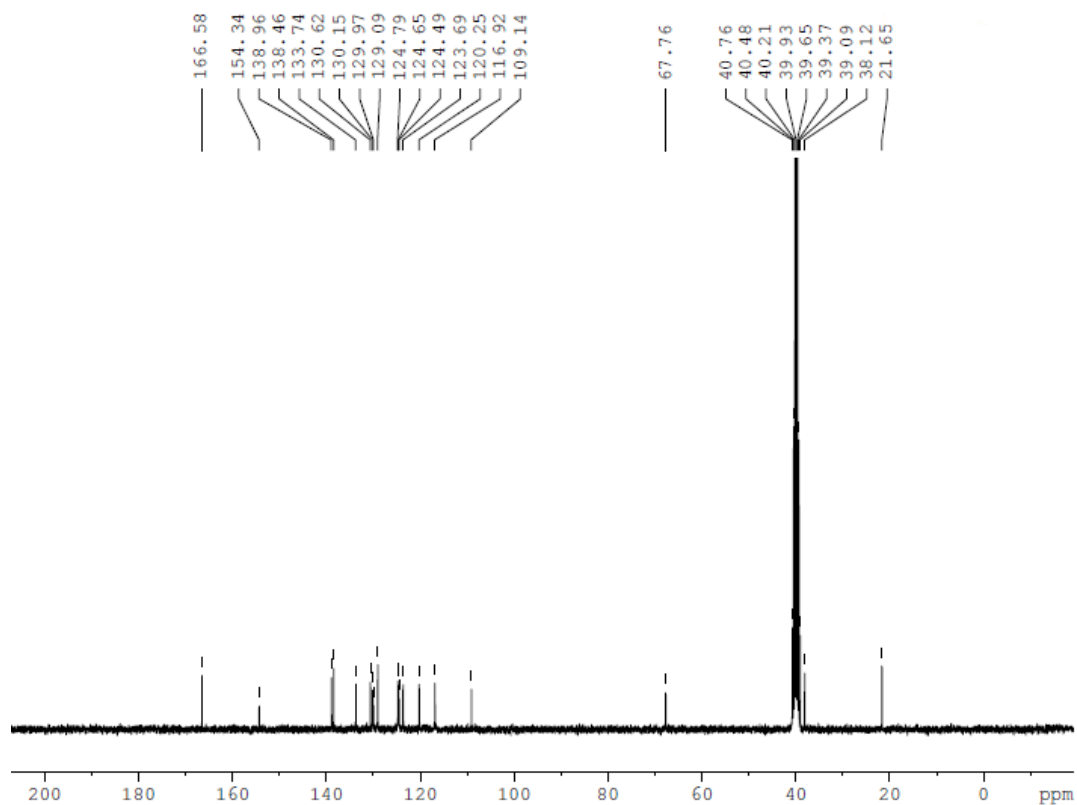

**Figure S11.**  $^{13}\text{C}$  NMR of compound **7d** in  $\text{DMSO-d}_6$  at 75 MHz.

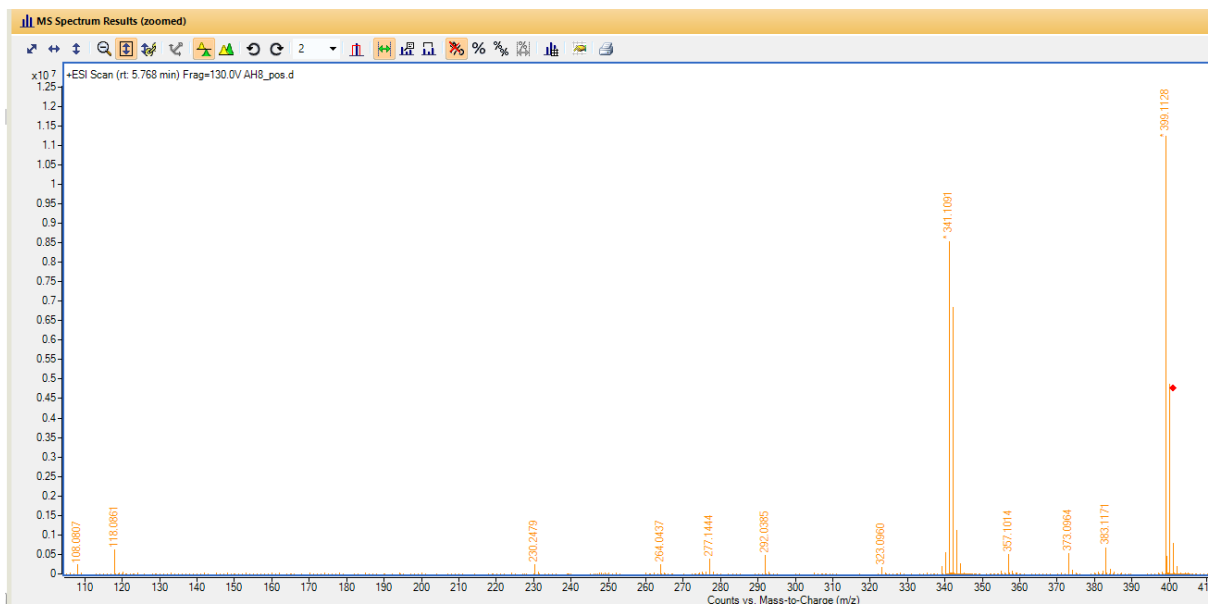

Figure S12. HRMS of compound **7d**.

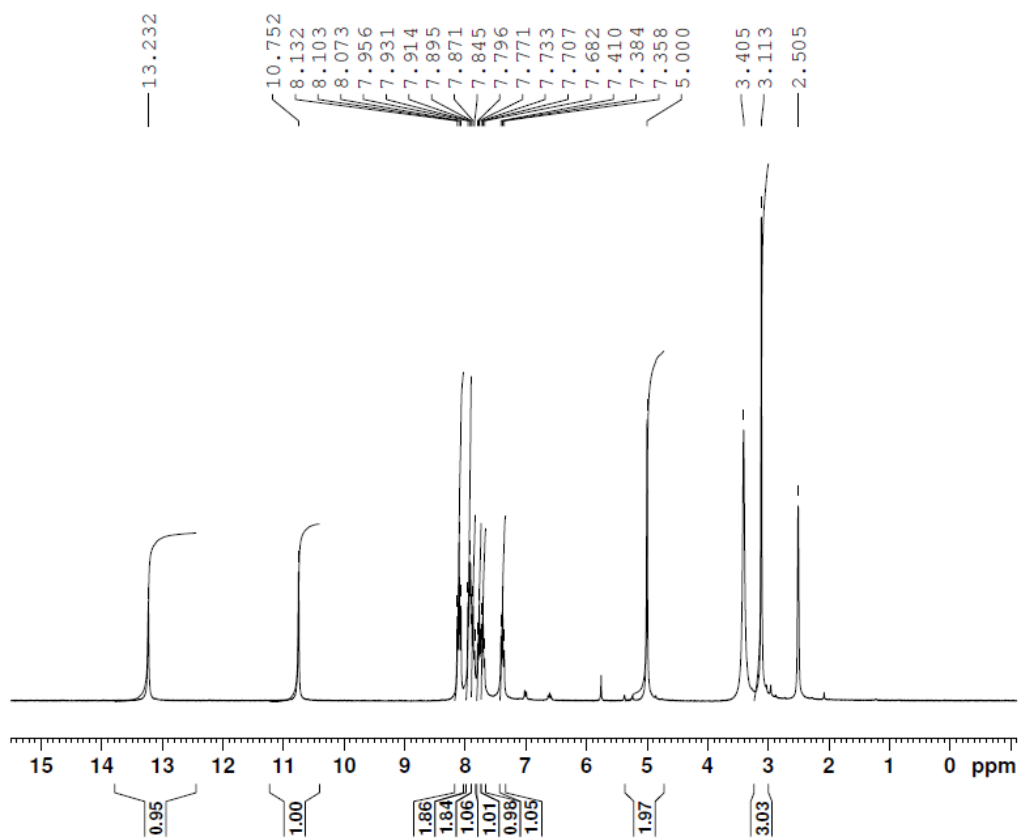

Figure S13.  $^1\text{H}$  NMR of compound **7e** in  $\text{DMSO-d}_6$  at 300 MHz.

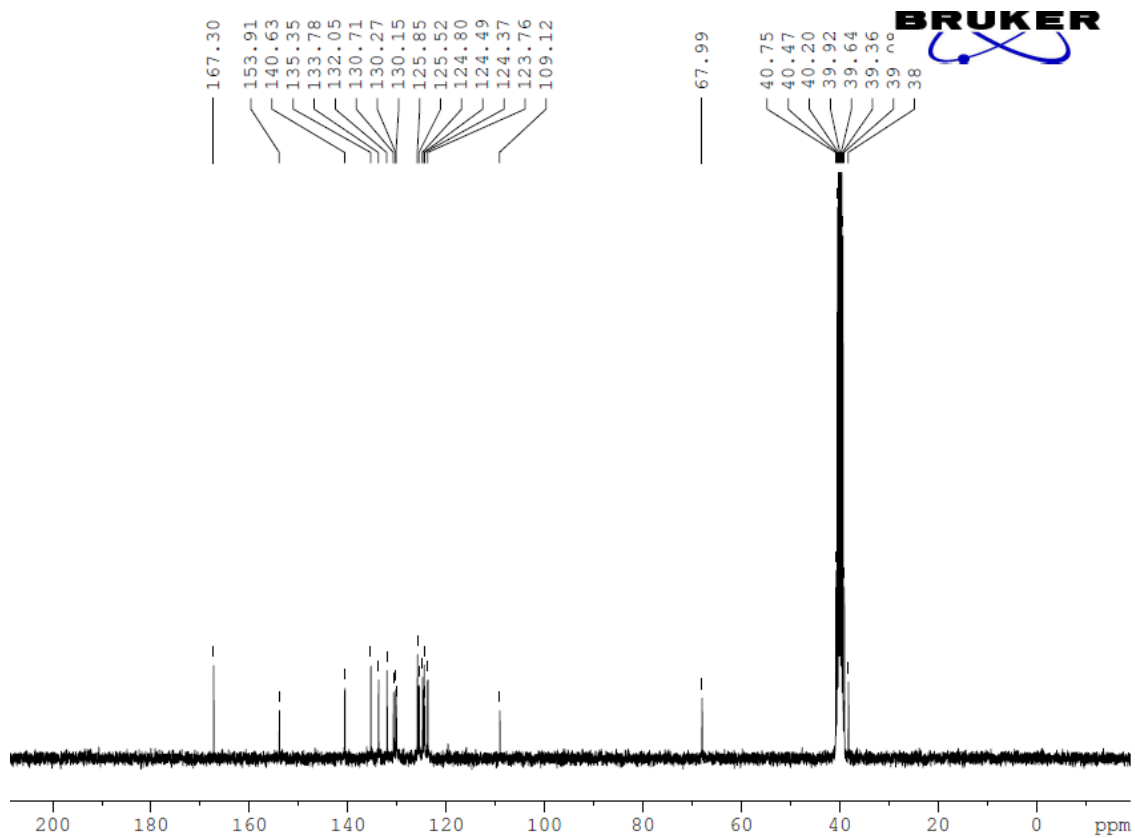

Figure S14.  $^{13}\text{C}$  NMR of compound **7e** in  $\text{DMSO-d}_6$  at 75 MHz.

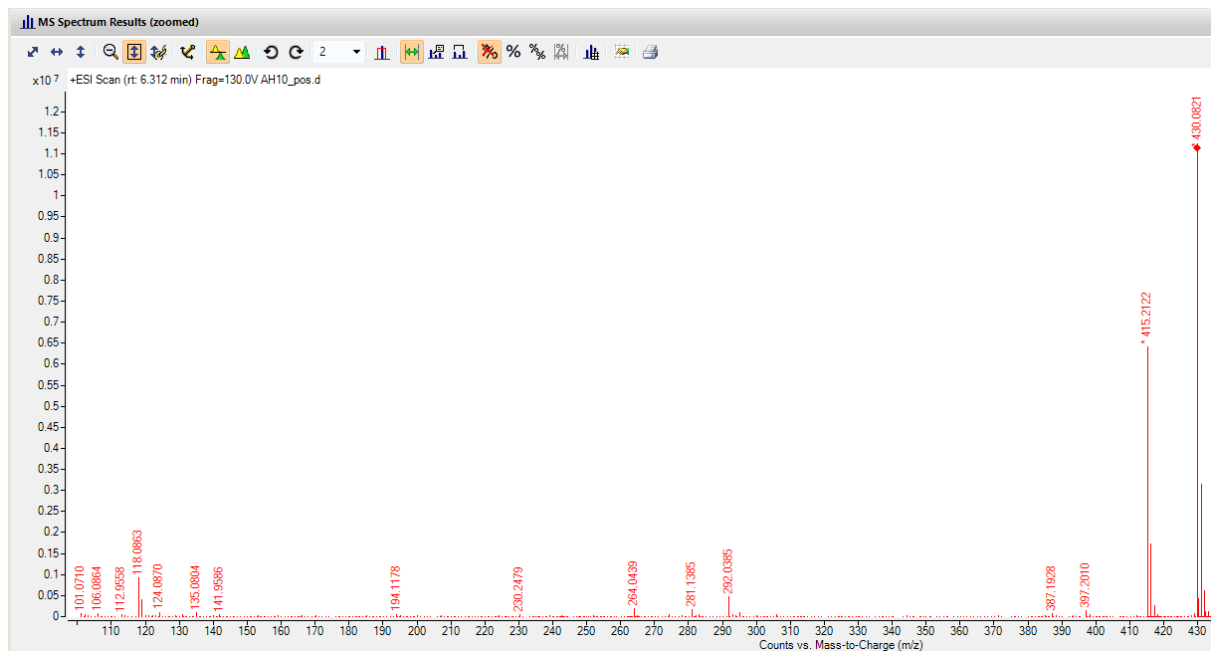

Figure S15. HRMS of compound **7e**.

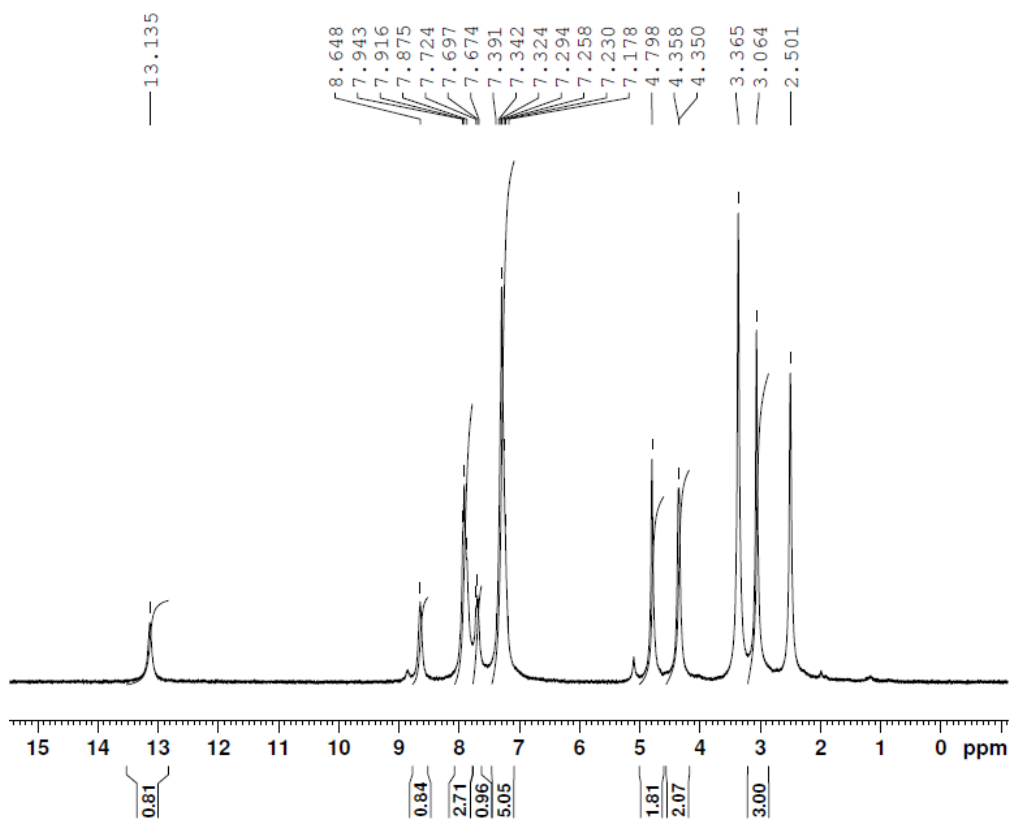

**Figure S16.**  $^1\text{H}$  NMR of compound **7f** in  $\text{DMSO-d}_6$  at 300 MHz.

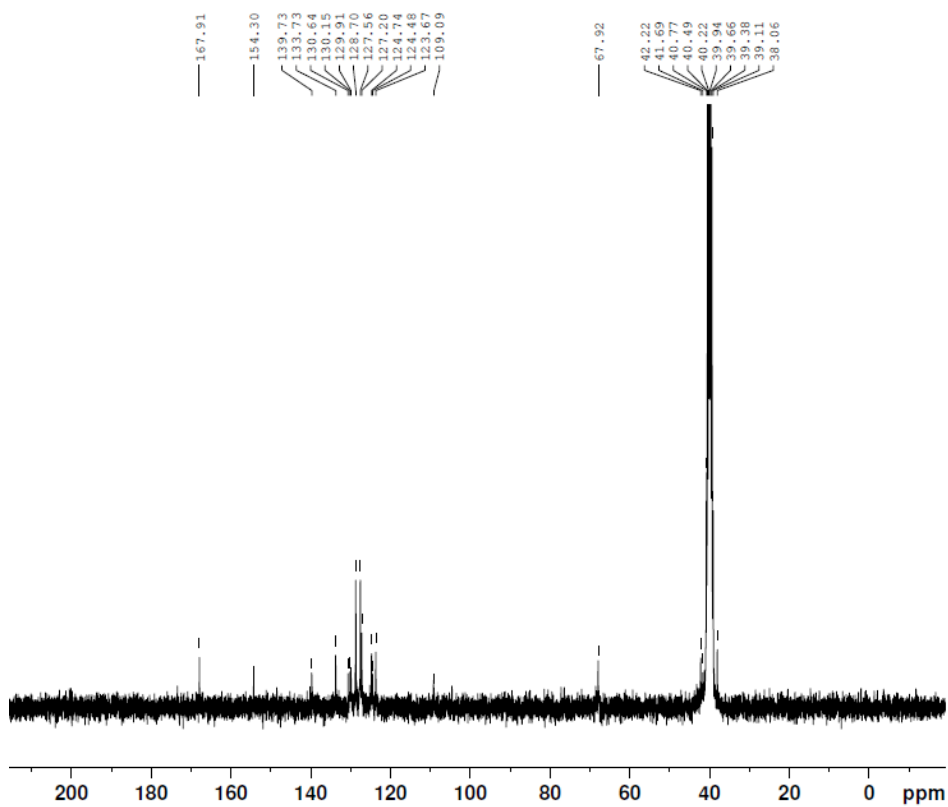

**Figure S17.**  $^{13}\text{C}$  NMR of compound **7f** in  $\text{DMSO-d}_6$  at 75 MHz.

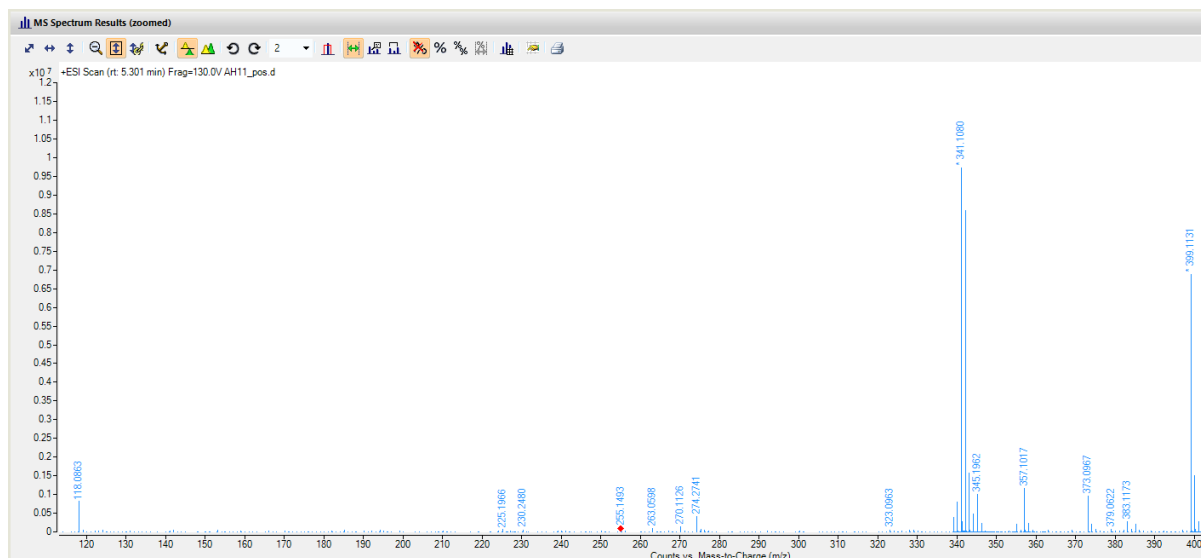

**Figure S18.** HRMS of compound **7f**.

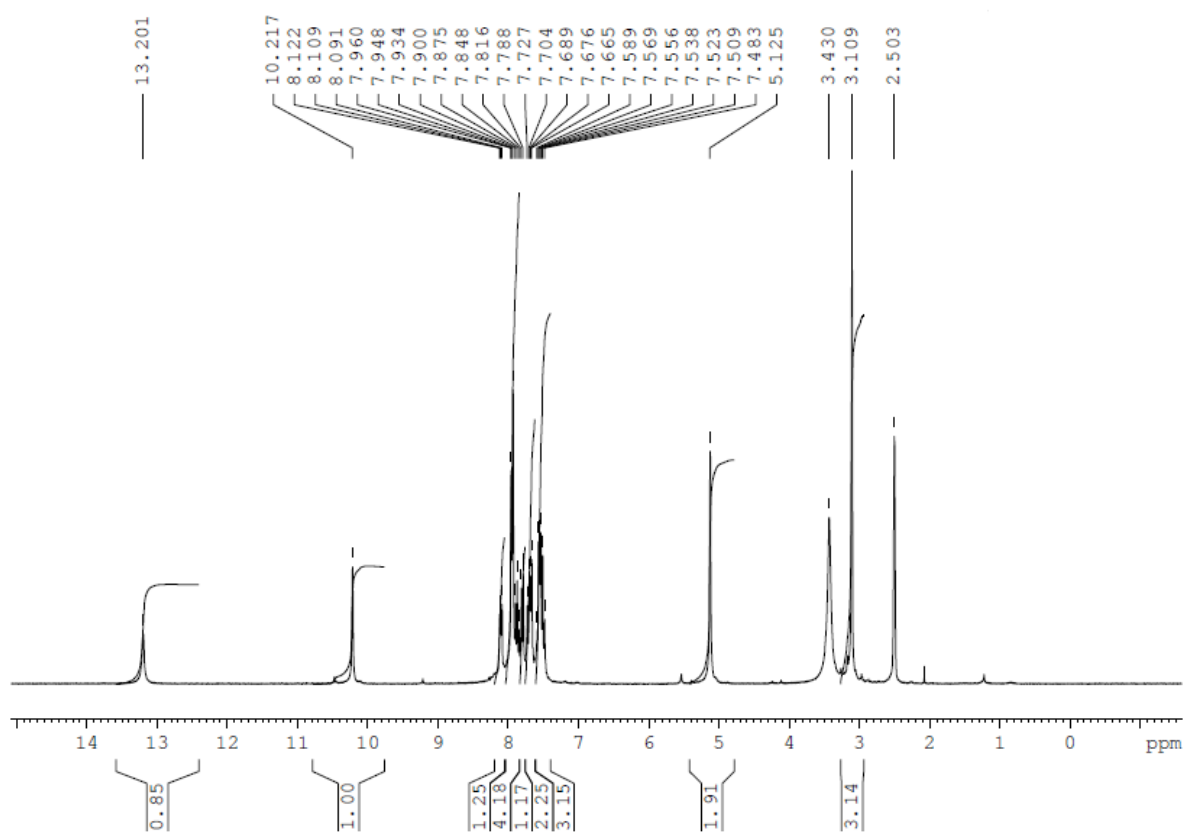

**Figure S19.** <sup>1</sup>H NMR of compound **7g** in DMSO-d<sub>6</sub> at 300 MHz.

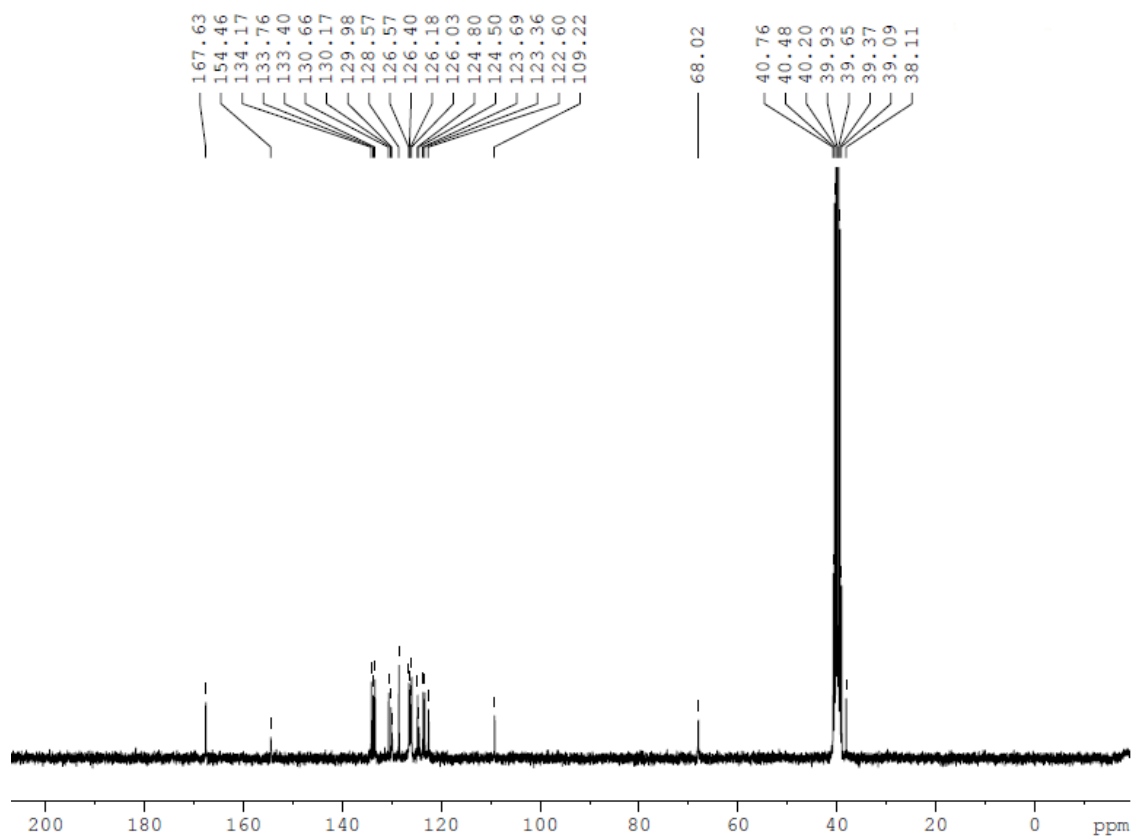

**Figure S20.**  $^{13}\text{C}$  NMR of compound **7g** in  $\text{DMSO-d}_6$  at 75 MHz.

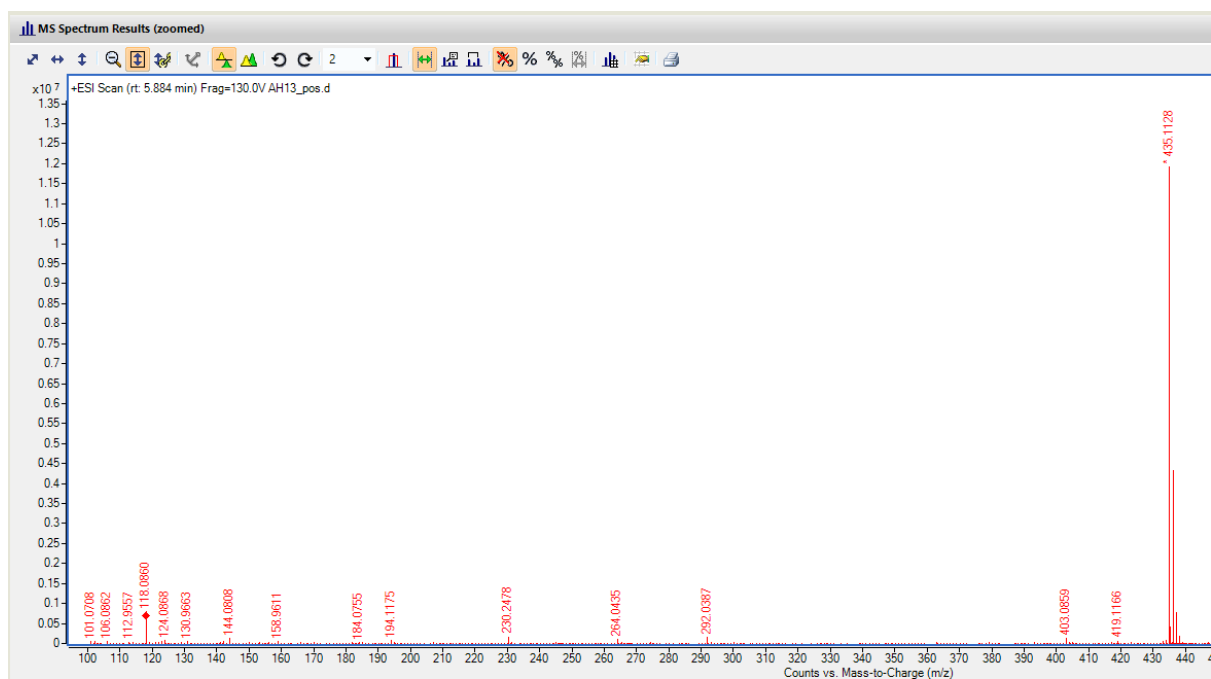

**Figure S21.** HRMS of compound **7g**.

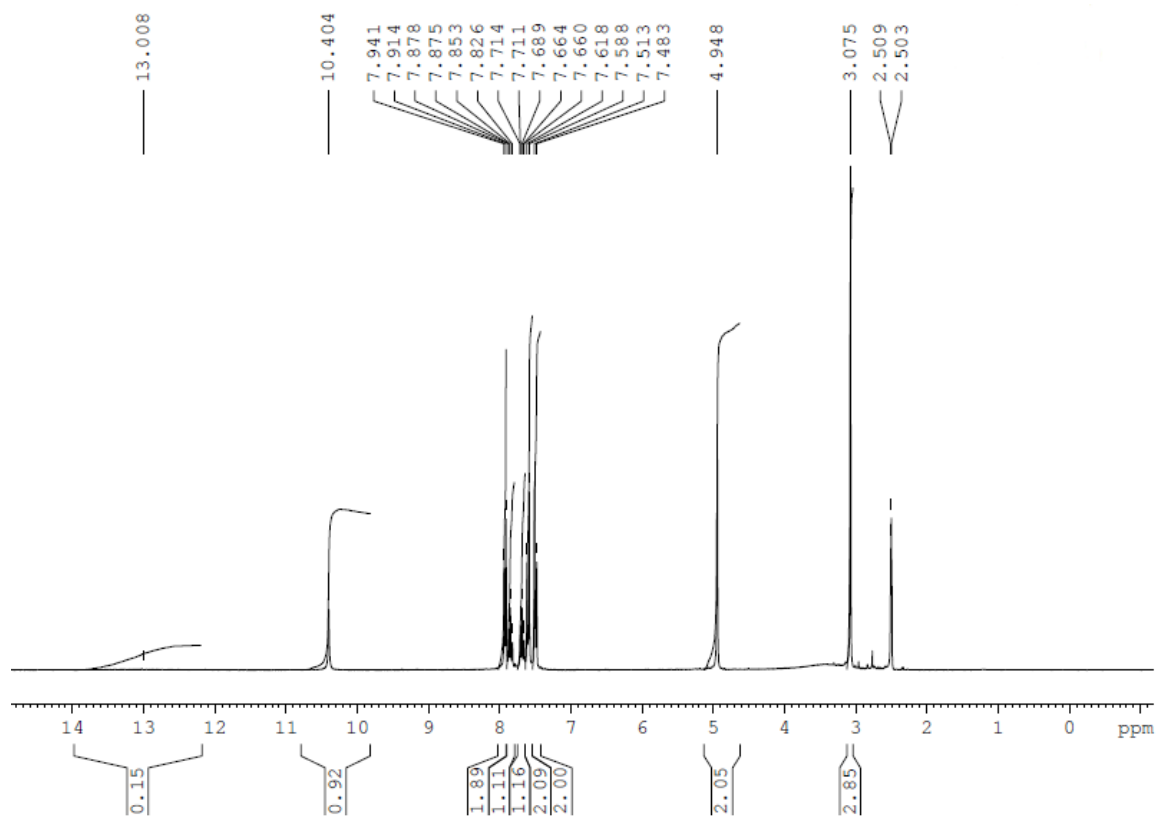

**Figure S22.**  $^1\text{H}$  NMR of compound **7h** in  $\text{DMSO-d}_6$  at 300 MHz.

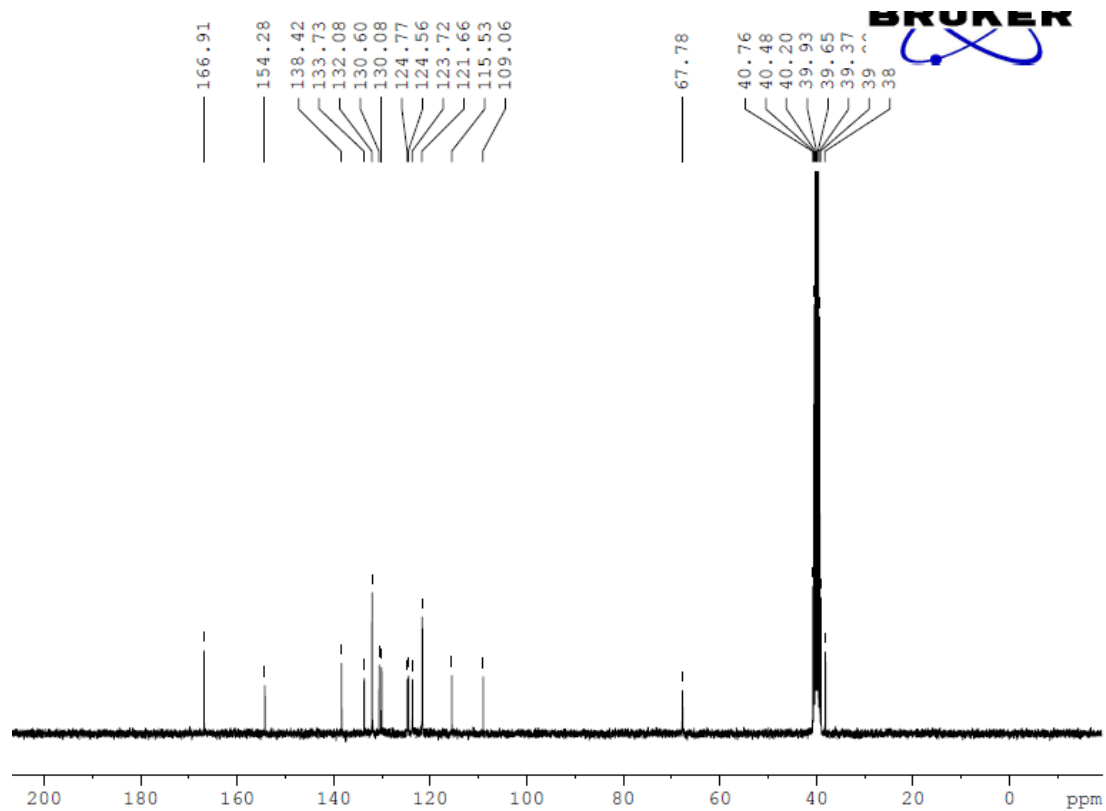

**Figure S23.**  $^{13}\text{C}$  NMR of compound **7h** in  $\text{DMSO-d}_6$  at 75 MHz.



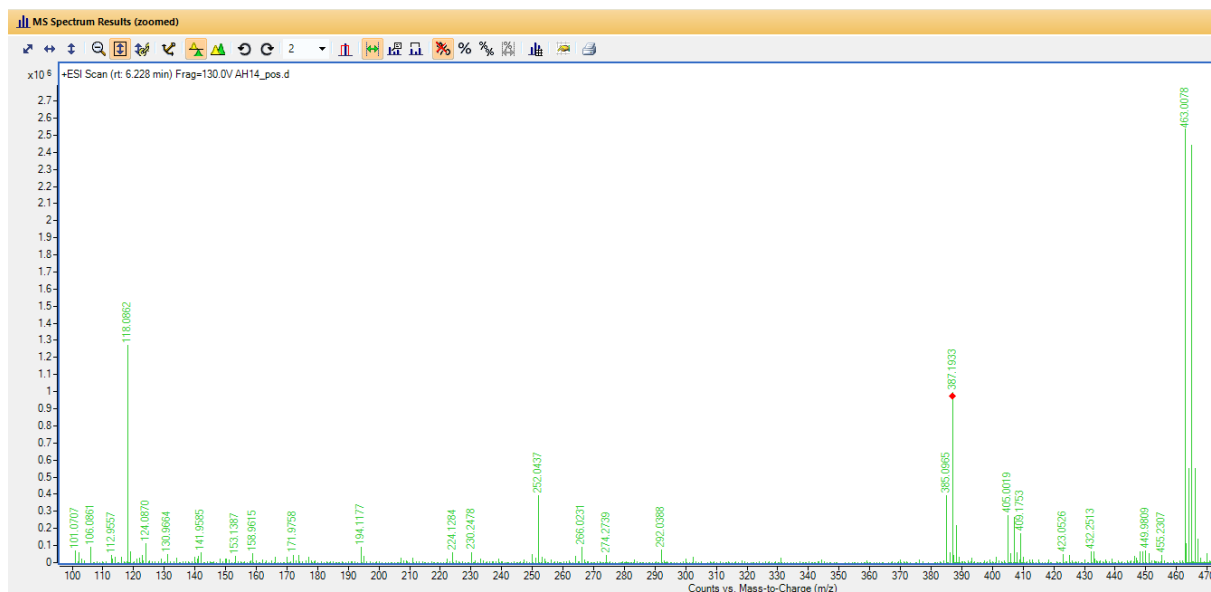

Figure S24. HRMS of compound **7h**.

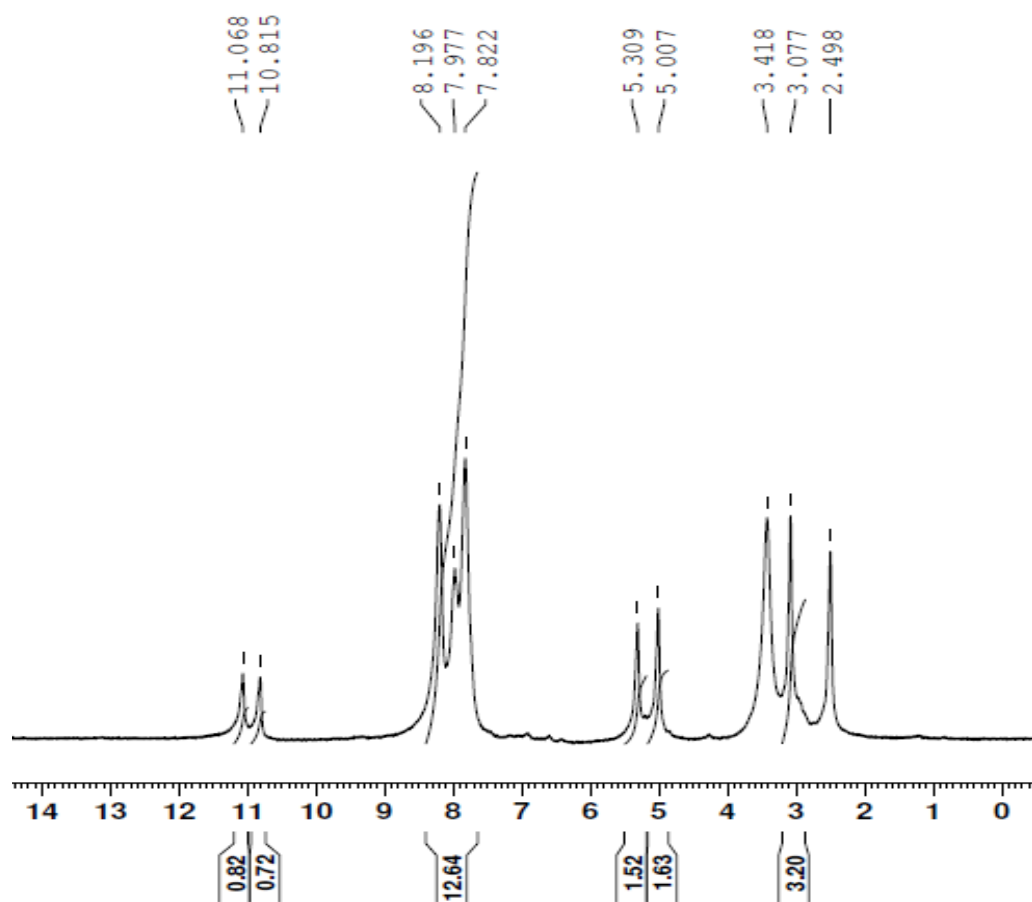

Figure S25. <sup>1</sup>H NMR of compound **7i** in DMSO-d<sub>6</sub> at 300 MHz.

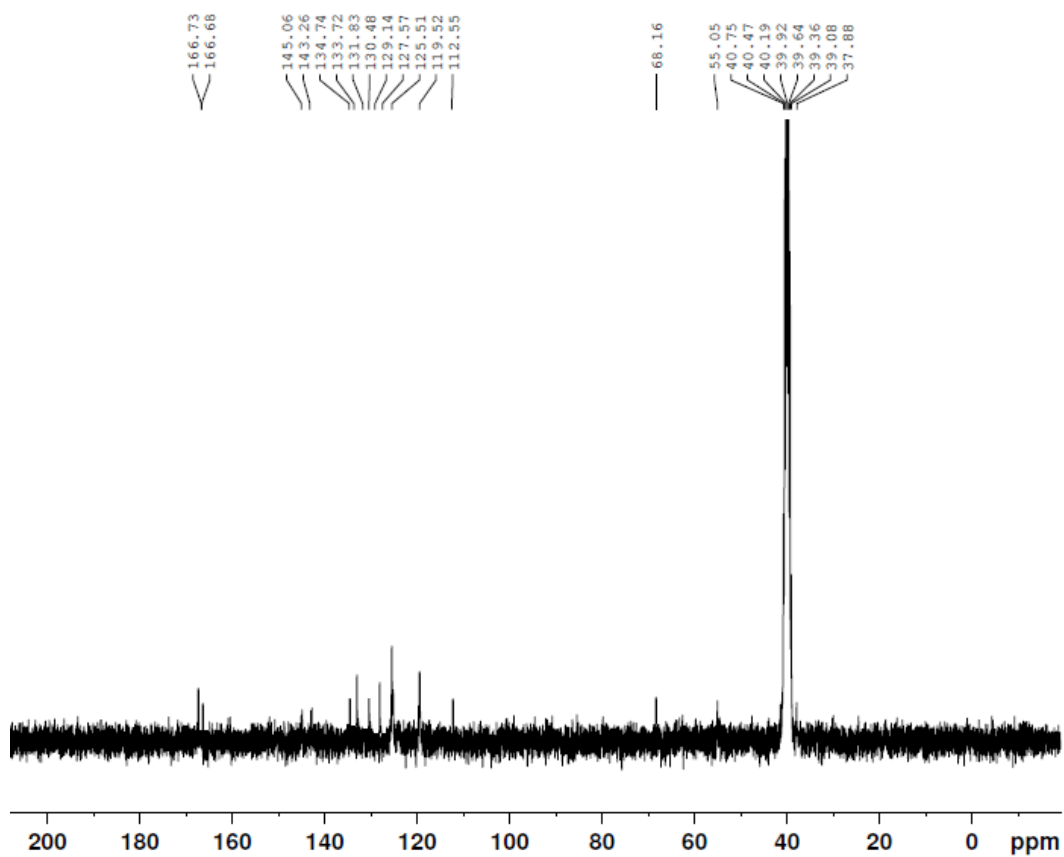

**Figure S26.**  $^{13}\text{C}$  NMR of compound **7i** in  $\text{DMSO-d}_6$  at 75 MHz.

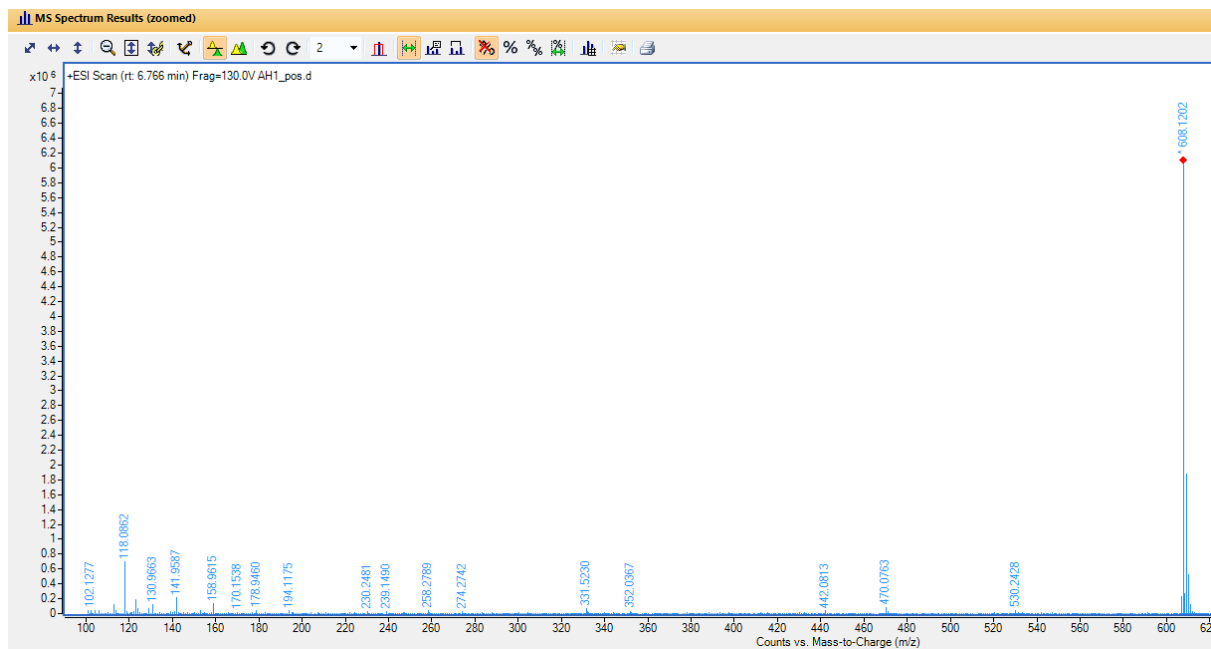

**Figure S27.** HRMS of compound **7i** in  $\text{DMSO-d}_6$  at 75 MHz.

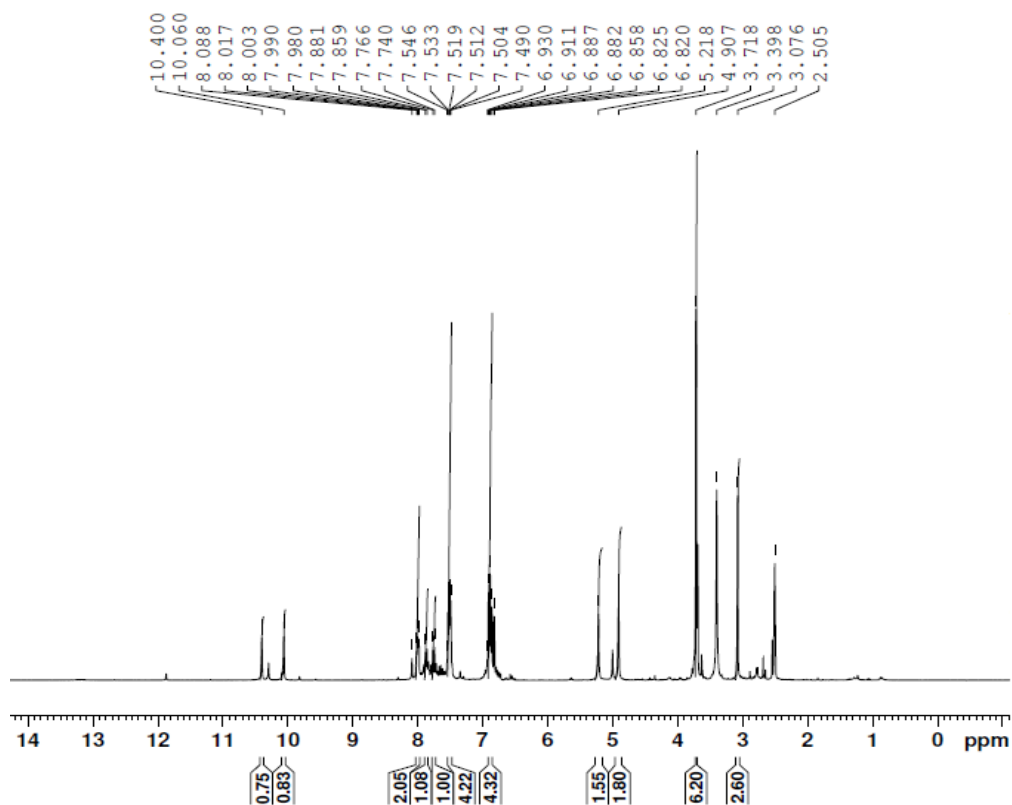

Figure S28.  $^1\text{H}$  NMR of compound **7j** in  $\text{DMSO-d}_6$  at 300 MHz.

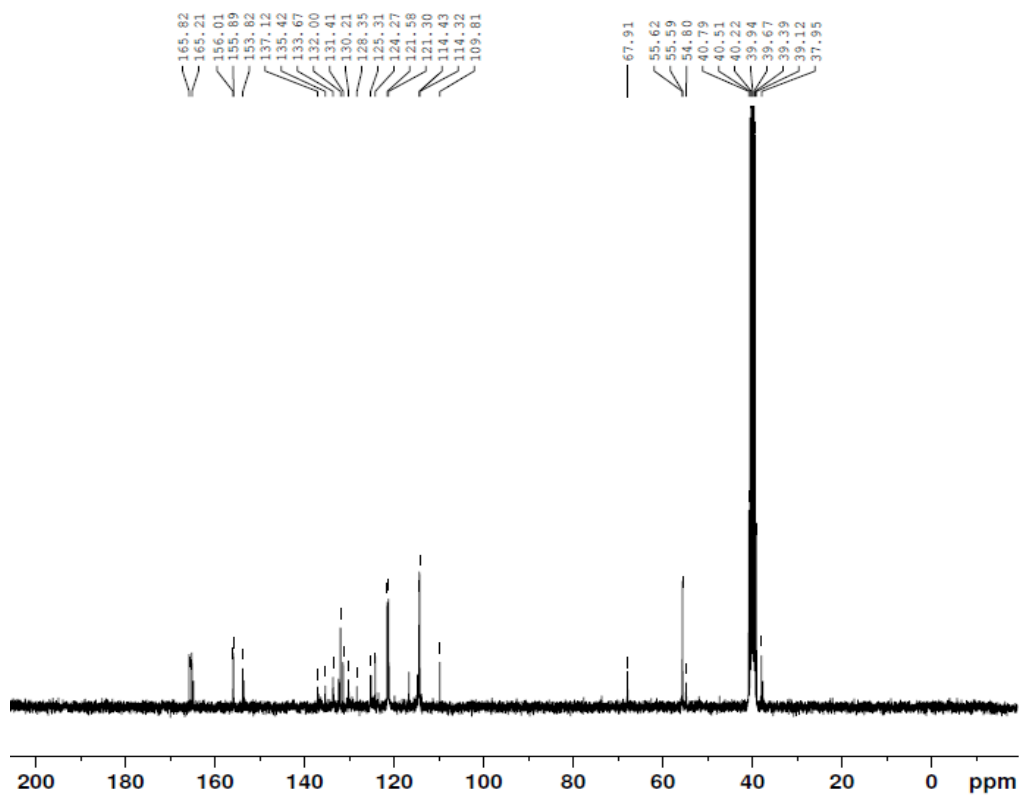

Figure S29.  $^{13}\text{C}$  NMR of compound **7j** in  $\text{DMSO-d}_6$  at 75 MHz.

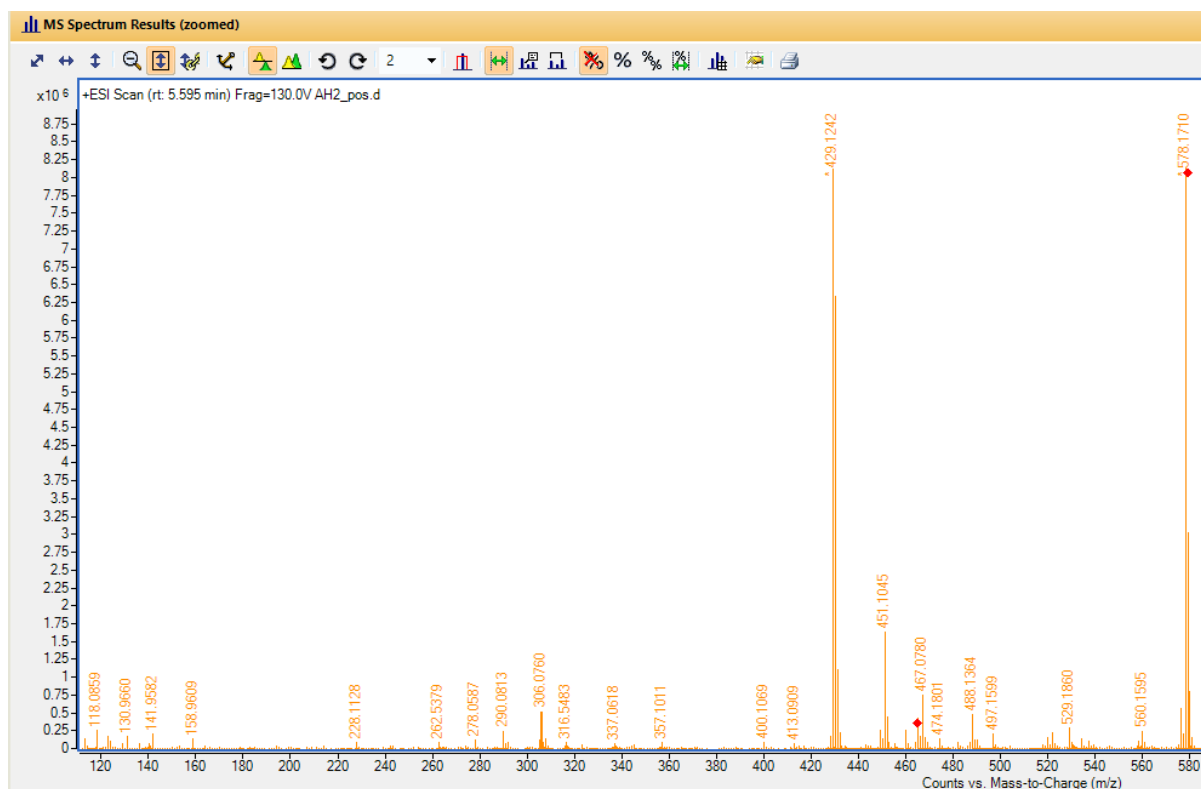

Figure S30. HRMS of compound 7j.

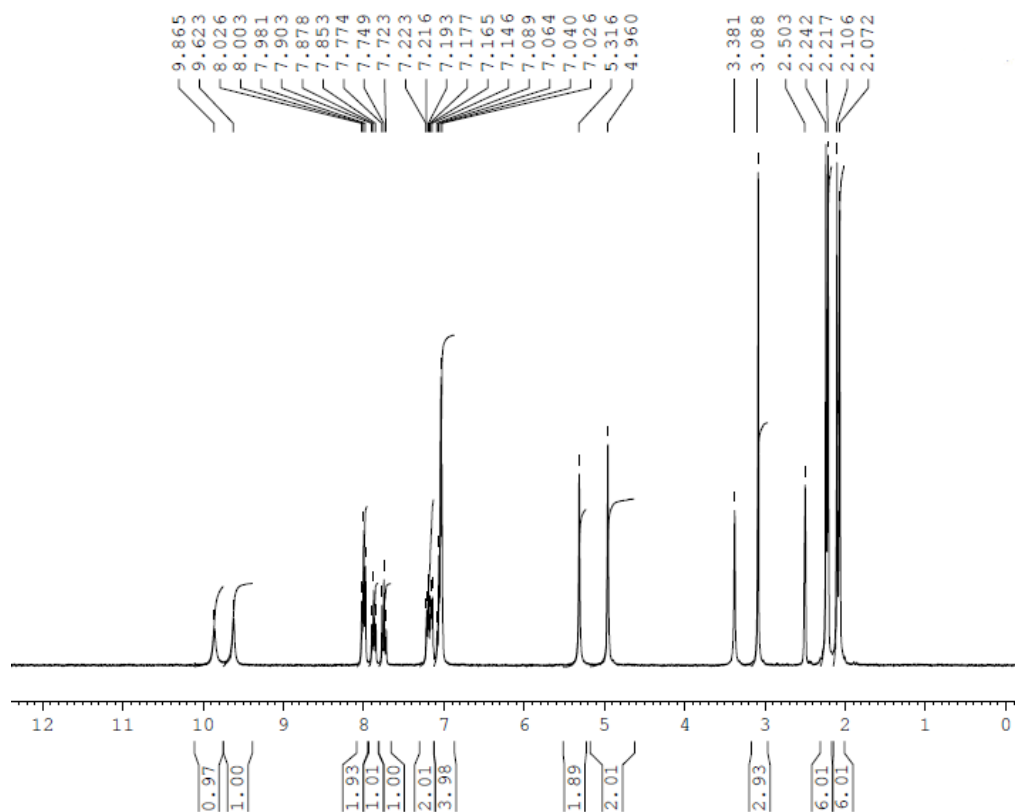

Figure S31. <sup>1</sup>H NMR of compound 7k in DMSO-d<sub>6</sub> at 300 MHz.

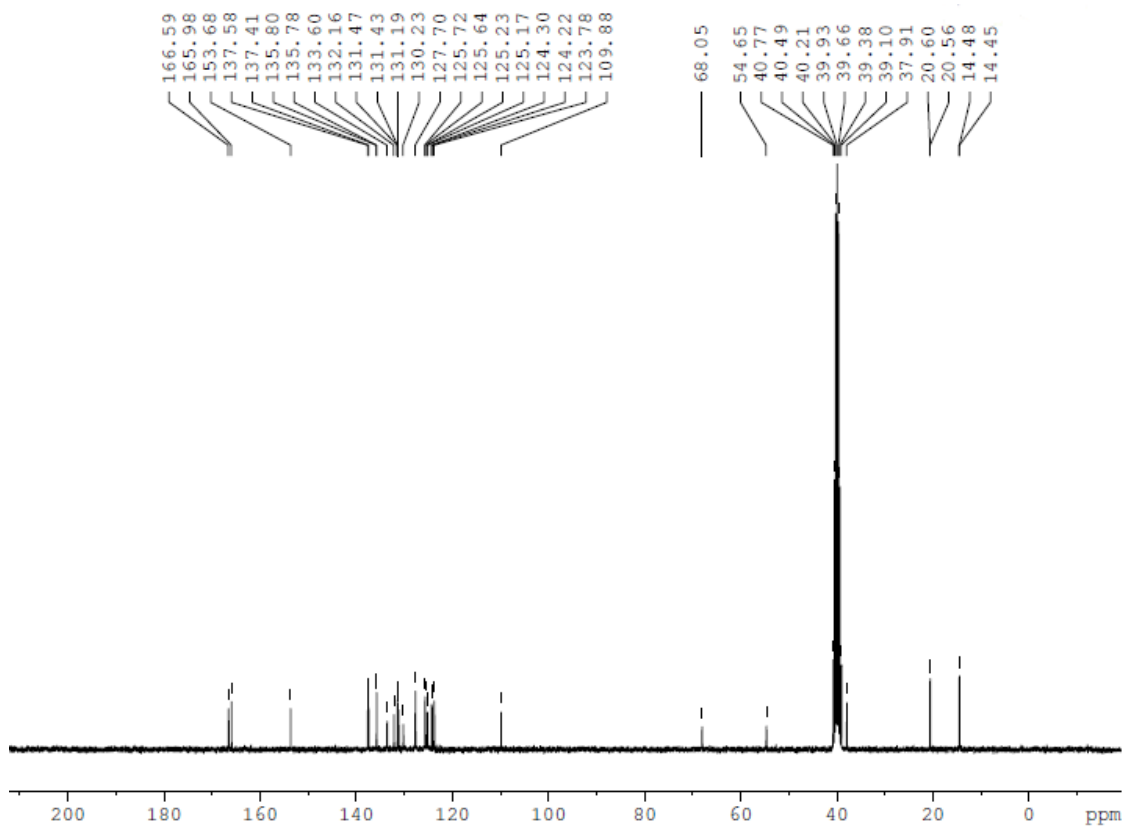

Figure S32. <sup>13</sup>C NMR of compound **7k** in DMSO-d<sub>6</sub> at 75 MHz.

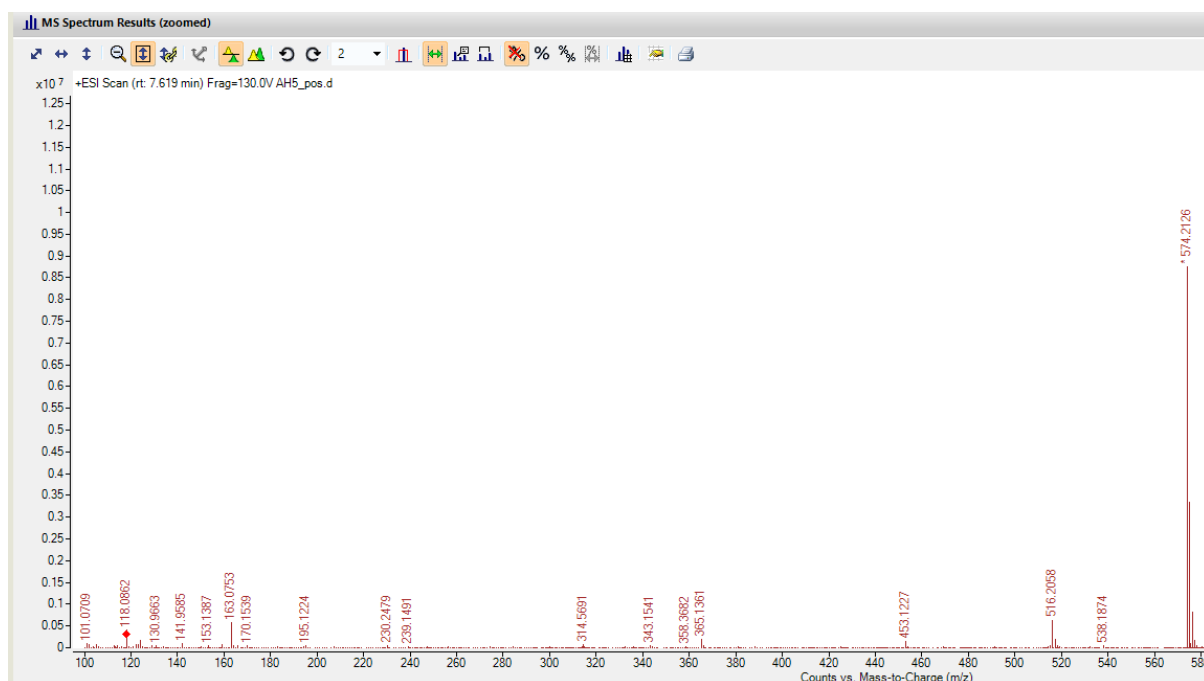

Figure S33. HRMS of compound **7k**.

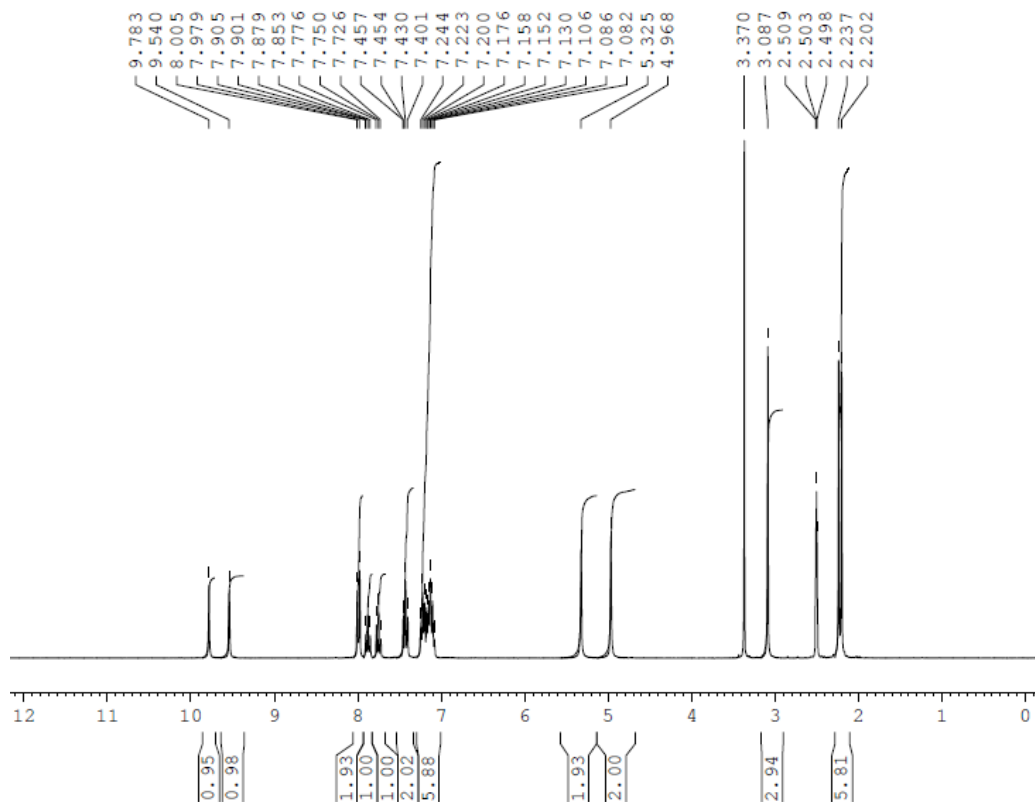

**Figure S34.**  $^1\text{H}$  NMR of compound **7I** in  $\text{DMSO-d}_6$  at 300 MHz.

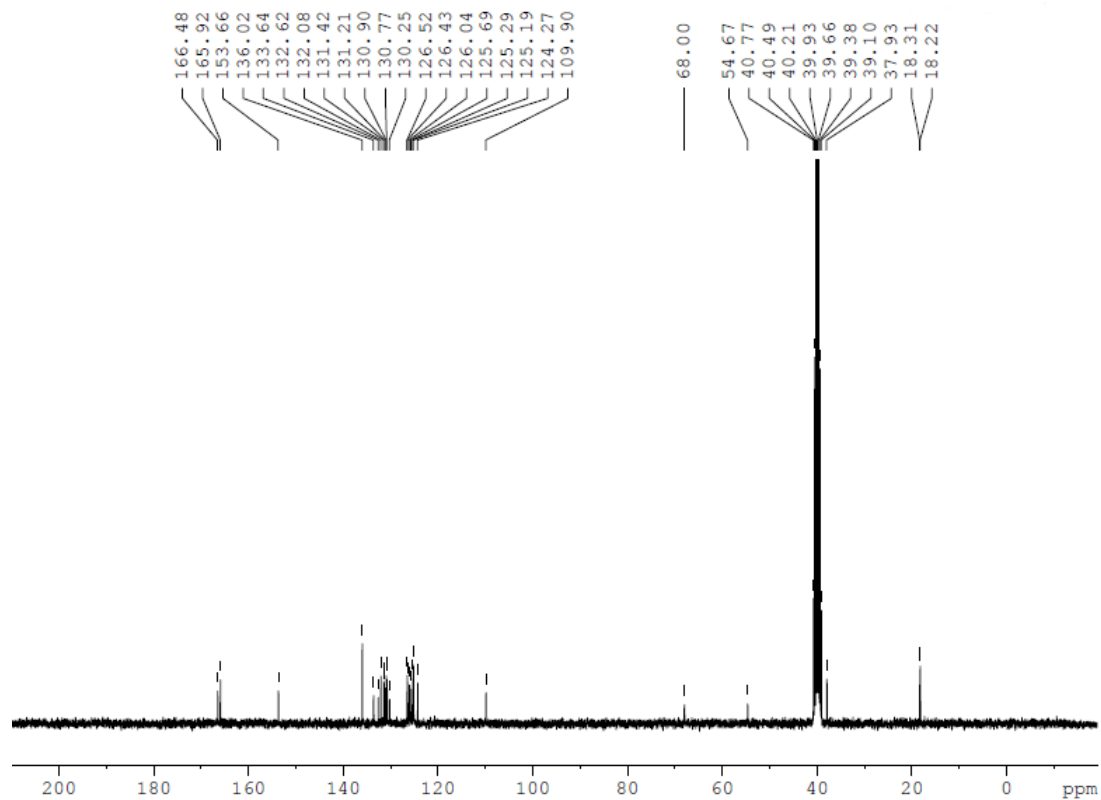

**Figure S35.**  $^{13}\text{C}$  NMR of compound **7I** in  $\text{DMSO-d}_6$  at 75 MHz.

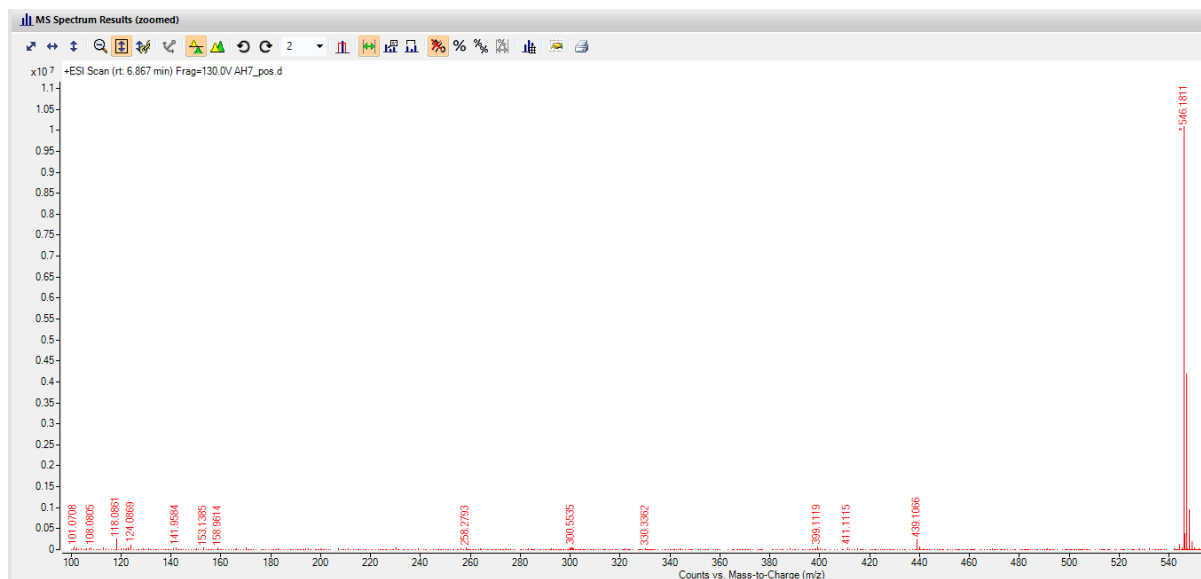

Figure S36. HRMS of compound 7l.

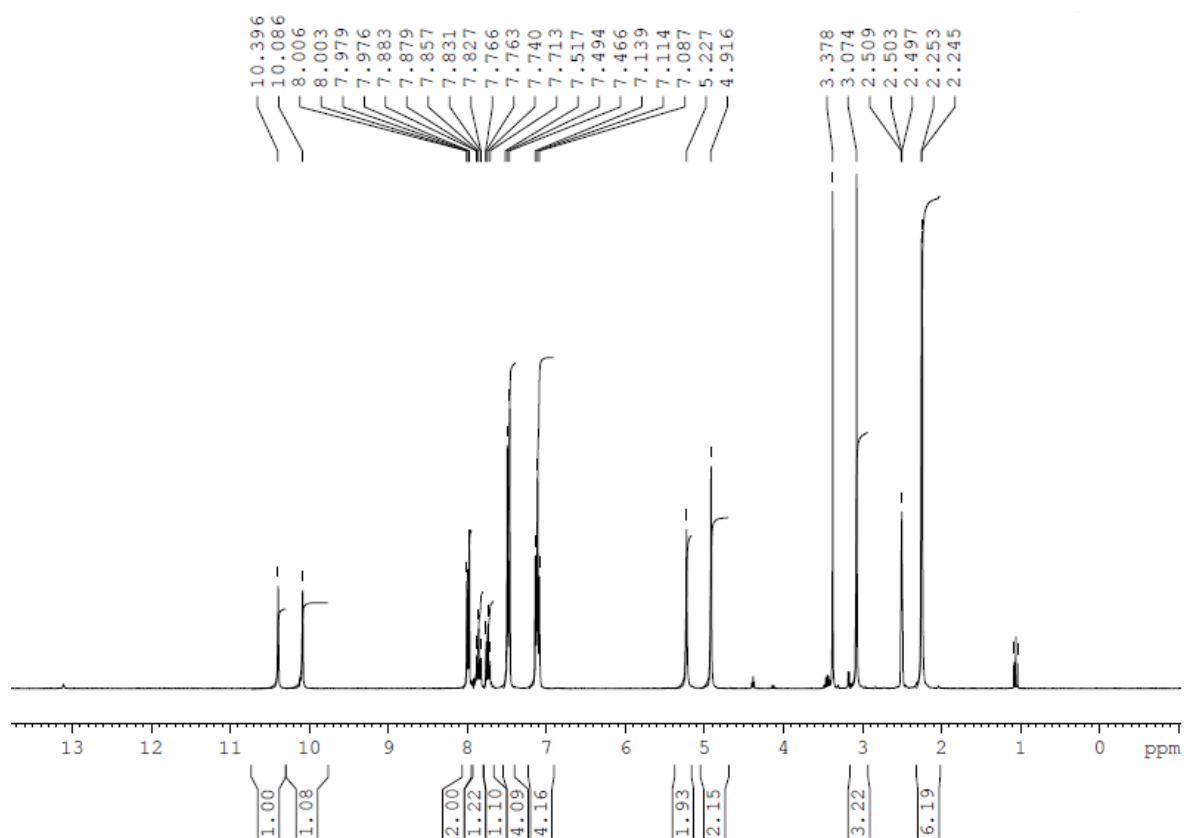

Figure S37. <sup>1</sup>H NMR of compound 7m in DMSO-d<sub>6</sub> at 300 MHz.

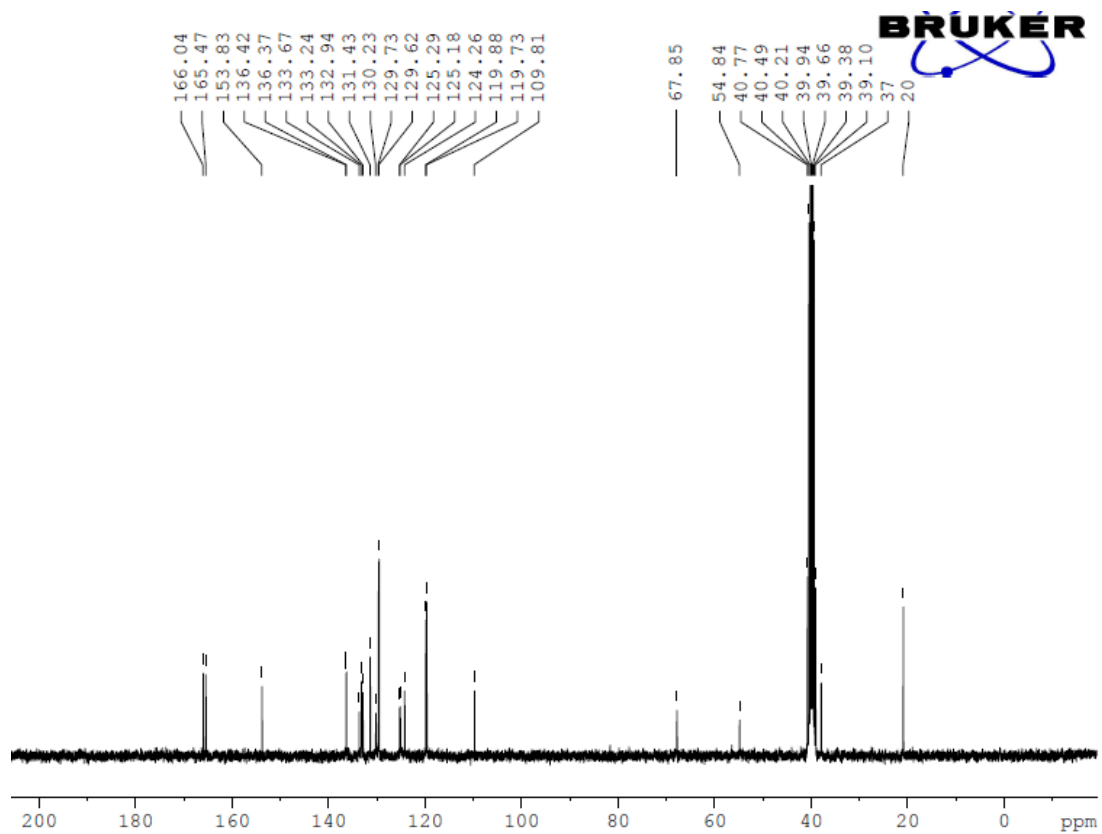

**Figure S38.**  $^{13}\text{C}$  NMR of compound **7m** in  $\text{DMSO-d}_6$  at 75 MHz.

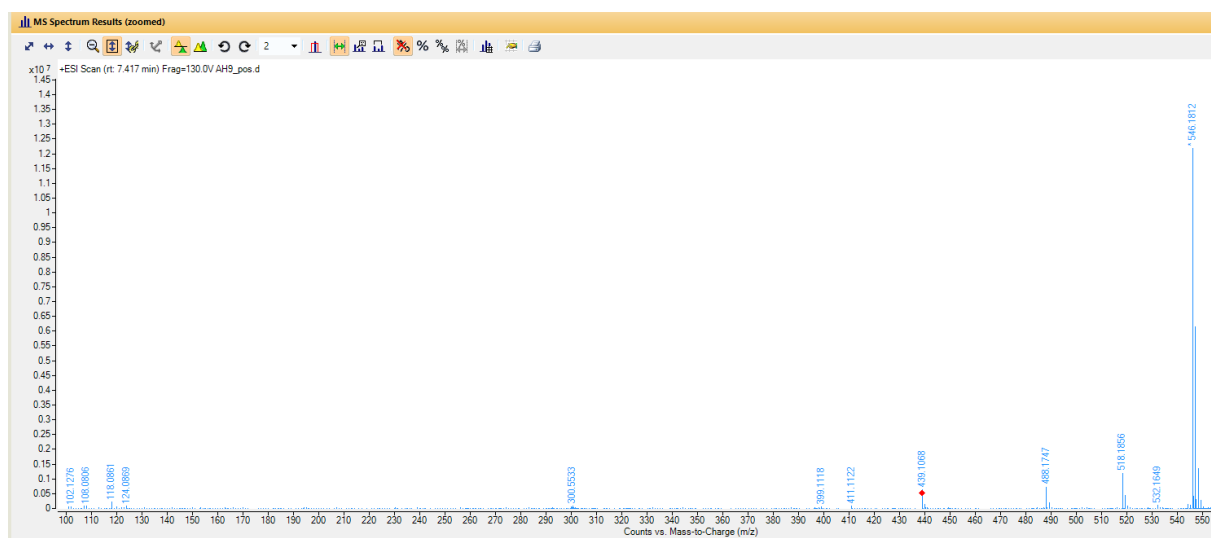

**Figure S39.** HRMS of compound **7m**.



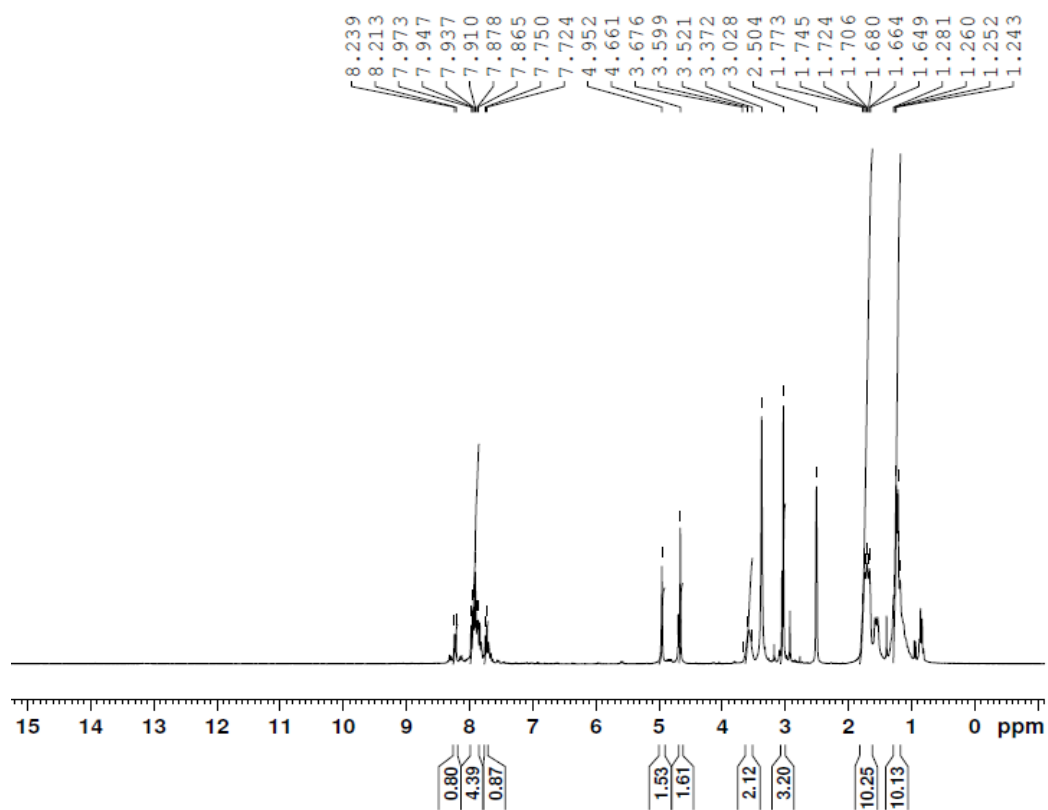

**Figure S40.**  $^1\text{H}$  NMR of compound **7n** in  $\text{DMSO-d}_6$  at 300 MHz.

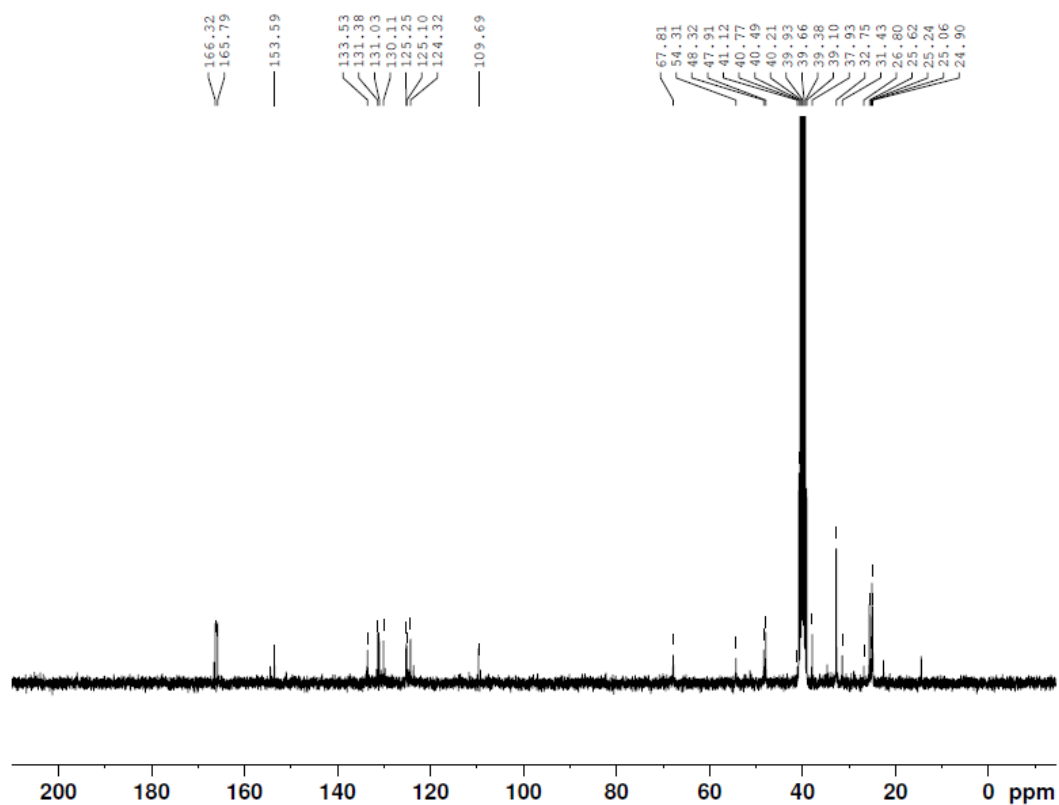

**Figure S41.**  $^{13}\text{C}$  NMR of compound **7n** in  $\text{DMSO-d}_6$  at 75 MHz.

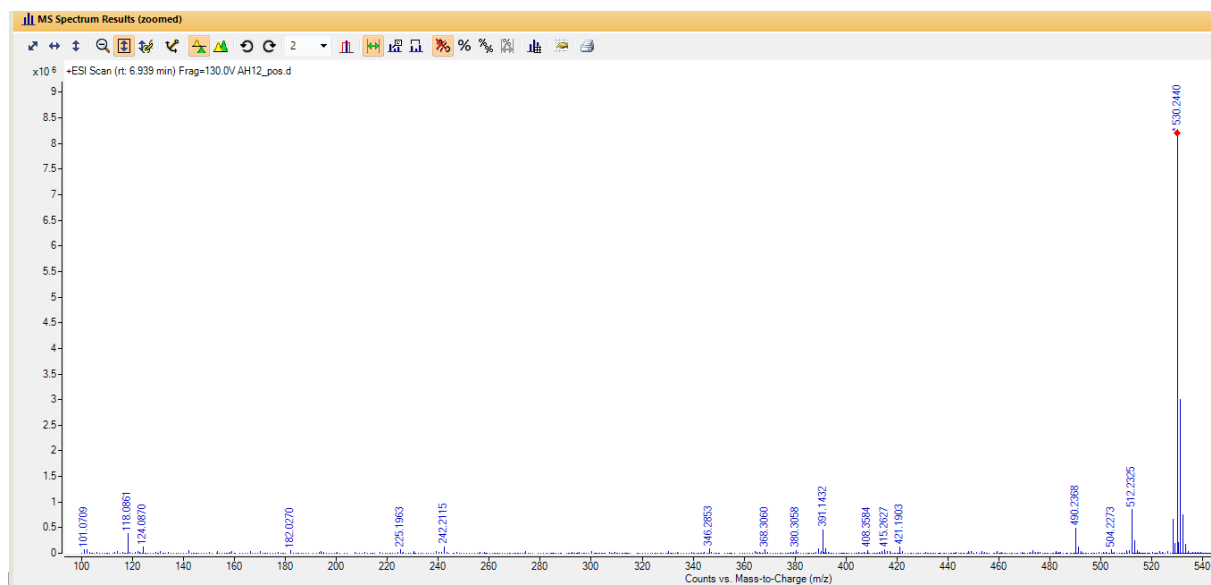

**Figure S42.** HRMS of compound **7n**.

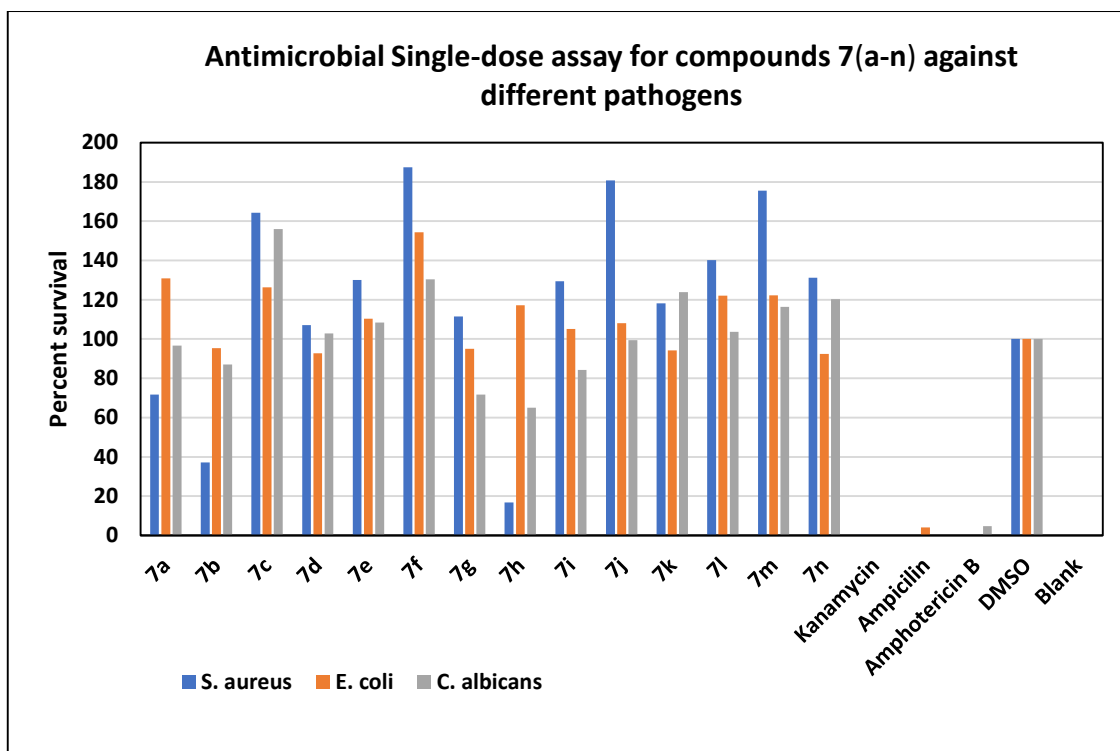

**Figure S43:** Graph showing results of antimicrobial single-dose microbroth assays of compounds **7a–n**, dose of tested compounds = 125 µg/mL, control antibiotics used: kanamycin = 50 µg/mL (*Staphylococcus aureus* ATCC 25923), ampicillin = 50 µg/mL (*Escherichia coli* ATCC 8739), and amphotericin B = 25 µg/mL (*Candida albicans* ATCC 90027). Dimethylsulfoxide (DMSO) was used as the negative control at 1.25% v/v.

**Table S1:** Results of single-dose antimicrobial and cytotoxic assays for compounds **7a–n**; dosage of tested compounds = 125 µg/mL; antibiotic control dosage (kanamycin = 50 µg/mL (*Staphylococcus aureus* ATCC 25923), ampicillin = 50 µg/mL (*Escherichia coli* ATCC 8739), and amphotericin B = 25 µg/mL (*Candida albicans* ATCC 90027). For cytotoxic assays, dosage of tested compounds = 10 µM; dosage of mensacarcin = 10 µM.

| Samples        | Percent survival / % Cell viability |                    |                         |                  |
|----------------|-------------------------------------|--------------------|-------------------------|------------------|
|                | <i>S. aureus</i> (SD)               | <i>E.coli</i> (SD) | <i>C. albicans</i> (SD) | HCT-116 (SD)     |
| <b>7a</b>      | 71.75 (21)                          | >100               | 96.68 (12)              | 85.40 (3)        |
| <b>7b</b>      | <b>37.17 (13)</b>                   | 95.34 (16)         | 86.98 (6)               | 88.90 (3)        |
| <b>7c</b>      | >100                                | >100               | >100                    | 81.40 (2)        |
| <b>7d</b>      | >100                                | 92.68 (2)          | >100                    | >100             |
| <b>7e</b>      | >100                                | >100               | >100                    | >100             |
| <b>7f</b>      | >100                                | >100               | >100                    | >100             |
| <b>7g</b>      | >100                                | 95.01 (1)          | 71.75 (0)               | >100             |
| <b>7h</b>      | <b>16.73 (3)</b>                    | >100               | 65.10 (5)               | >100             |
| <b>7i</b>      | >100                                | >100               | 84.21 (5)               | 87.30 (6)        |
| <b>7j</b>      | >100                                | >100               | 99.45 (6)               | >100             |
| <b>7k</b>      | >100                                | 94.18 (0.1)        | >100                    | 90.70 (4)        |
| <b>7l</b>      | >100                                | >100               | >100                    | <b>63.60 (1)</b> |
| <b>7m</b>      | >100                                | >100               | >100                    | >100             |
| <b>7n</b>      | >100                                | 92.35 (1)          | >100                    | >100             |
| Kanamycin      | 0.37 (0.7)                          | –                  | –                       | –                |
| Ampicillin     | –                                   | 4.16 (3)           | –                       | –                |
| Amphotericin B | –                                   | –                  | 4.71 (1)                |                  |
| Mensacarcin    | –                                   | –                  | –                       | 11.50 (1)        |

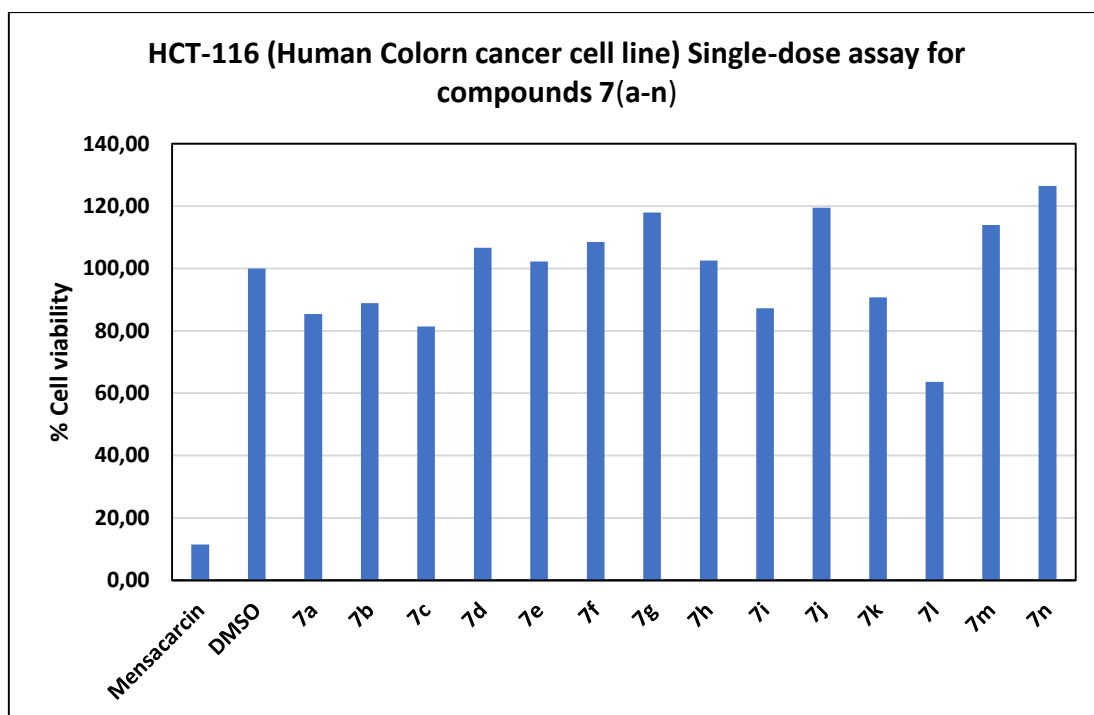

**Figure S44:** Graph showing cell viability of compounds **7a–n** against human colon carcinoma cell line (HCT-116, ATCC CCL-247), dose of tested compounds = 10  $\mu$ M, dose of positive control (mensacarcin) = 10  $\mu$ M.

### 3. Characterization data of compounds 7a–n

All the synthesized compounds in DMSO- $d_6$  were scanned for their  $^1\text{H}$  NMR spectra at 300 MHz and  $^{13}\text{C}$  NMR at 75 MHz.

#### ***N*-(4-Chlorophenyl)-2-(3-hydroxy-4-methyl-5,5-dioxidobenzo[e]pyrazolo [4,3-*c*][1,2] thiazine-1(4*H*)-yl)acetamide (7a)**

Off white solid, Yield 335 mg (80%), m.p 156-158 °C, FT-IR: 1537 (C=O), 1335, 1171 ( $\text{SO}_2$ ), 1239 (C–N);  $^1\text{H}$  NMR ( $\delta$ ): *N*-CH<sub>3</sub> (linked with thiazine ring) = 3.08 (s, 3H), *N*-CH<sub>2</sub> (linked with pyrazole ring) = 4.95 (s, 2H), N-H (amide) = 10.36 (s, 1H), O-H (linked with pyrazole ring) = 13.12 (s, 1H); Aromatic protons: 7.37 (d, 2H,  $J$  = 8.8 Hz), 7.65 (d, 2H,  $J$  = 8.7 Hz), 7.71 (d, 1H,  $J$  = 6.0 Hz), 7.86 (t, 1H,  $J$  = 7.5 Hz), 7.92 (t, 2H,  $J$  = 7.6 Hz);  $^{13}\text{C}$  NMR ( $\delta$ ): 38.1, 67.8, 109.2, 121.3, 123.7, 124.4, 124.8, 127.5, 129.2, 130.0, 130.2, 130.6, 133.8, 138.0, 154.3, 166.9; HR-MS: Mass to charge ratio calculated from theoretical formula  $\text{C}_{18}\text{H}_{15}\text{ClN}_4\text{O}_4\text{S}$   $[\text{M}+\text{H}]^+$  419.0575, observed 419.0578,  $\Delta\text{ppm}$  0.71.

#### ***N*-(3-Chlorophenyl)-2-(3-hydroxy-4-methyl-5,5-dioxidobenzo[e] pyrazolo [4,3-*c*][1,2] thiazine-1(4*H*)-yl)acetamide (7b)**

Peach colored solid, Yield 331 mg (79%), m.p 170-172 °C, FT-IR: 1592 (C=O), 1335, 1179 ( $\text{SO}_2$ ), 1298 (C–N);  $^1\text{H}$  NMR ( $\delta$ ): *N*-CH<sub>3</sub> (linked with thiazine ring) = 3.08 (s,3H), *N*-CH<sub>2</sub> (linked with pyrazole ring) = 4.96 (s, 2H), N-H (amide) = 10.45 (s, 1H), O-H (linked with pyrazole ring) = 13.21 (s, 1H); Aromatic protons: 7.13 (d, 1H,  $J$  = 6.9 Hz), 7.35 (t, 1H,  $J$  = 8.1 Hz), 7.48 (d, 1H,  $J$  = 8.4 Hz), 7.61 (t, 1H,  $J$  = 7.7 Hz), 7.70 (t, 1H,  $J$  = 6.8 Hz), 7.83 (1H, s), 7.93 (d, 2H,  $J$  = 8.1 Hz);  $^{13}\text{C}$  NMR ( $\delta$ ): 38.1, 67.8, 109.1, 118.1, 119.2, 123.4, 123.7, 124.5, 124.7, 124.8, 130.2, 130.6, 131.0, 133.6, 133.7, 140.5, 154.2, 167.1; HR-MS: Mass to charge ratio calculated from theoretical formula  $\text{C}_{18}\text{H}_{15}\text{ClN}_4\text{O}_4\text{S}$   $[\text{M}+\text{H}]^+$  419.0575 and observed 419.0578,  $\Delta\text{ppm}$  0.71.

#### ***N*-(3,5-Dimethylphenyl)-2-(3-hydroxy-4-methyl-5,5-dioxidobenzo[e]pyrazolo[4,3-*c*][1,2]thiazine-1(4*H*)-yl)acetamide (7c)**

Light brown solid, Yield 341 mg (83%), m.p 152-154 °C, FT-IR: 1510 (C=O), 1339, 1158 ( $\text{SO}_2$ ), 1266 (C–N);  $^1\text{H}$  NMR ( $\delta$ ): Ar-CH<sub>3</sub> (linked with *N*-aryl-acetamide) = 2.23 (s, 6H), *N*-CH<sub>3</sub> (linked with thiazine ring) = 3.09 (s, 3H), *N*-CH<sub>2</sub> (linked with pyrazole ring) = 4.92 (s, 2H), N-H (amide) = 10.04 (s, 1H), O-H (linked with pyrazole ring) = 13.10 (s,

1H); Aromatic protons: 6.70 (s, 1H), 7.24 (s, 2H), 7.69 (t, 1H,  $J = 7.5$  Hz), 7.86 (t, 1H,  $J = 7.4$  Hz), 7.89 – 7.96 (m, 2H);  $^{13}\text{C}$  NMR ( $\delta$ ): 21.5, 38.1, 67.7, 109.2, 117.5, 123.7, 124.4, 124.8, 125.5, 129.9, 130.2, 130.6, 133.7, 138.2, 138.9, 154.4, 166.5; HR-MS: Mass to charge ratio calculated from theoretical formula  $\text{C}_{20}\text{H}_{20}\text{N}_4\text{O}_4\text{S}$   $[\text{M}+\text{H}]^+$  413.1278 and observed 413.1289,  $\Delta\text{ppm}$  2.66.

**2-(3-Hydroxy-4-methyl-5,5-dioxidobenzo[e]pyrazolo[4,3-c][1,2] thiazine-1(4H)-yl)-N-(*m*-tolyl)acetamide (7d)**

Light orange solid, Yield 322 g (81%), m.p 155-156 °C, FT-IR: 1537 (C=O), 1336, 1155 ( $\text{SO}_2$ ), 1260 (C–N);  $^1\text{H}$  NMR ( $\delta$ ): Ar- $\text{CH}_3$  (linked with *N*-aryl-acetamide) = 2.27 (s, 3H), *N*- $\text{CH}_3$  (linked with thiazine ring) = 3.09 (s, 3H), *N*- $\text{CH}_2$  (linked with pyrazole ring) = 4.94 (s, 2H), N-H (amide) = 10.14 (s, 1H), O-H (linked with pyrazole ring) = 13.14 (s, 1H); Aromatic protons: 6.88 (d, 1H,  $J = 7.5$  Hz), 7.19 (t, 1H,  $J = 7.8$  Hz), 7.39 (d, 1H,  $J = 8.3$  Hz), 7.48 (s, 1H), 7.70 (t, 1H,  $J = 7.5$  Hz), 7.80 – 8.04 (m, 3H);  $^{13}\text{C}$  NMR ( $\delta$ ): 21.6, 38.1, 67.8, 109.1, 117.0, 120.2, 123.7, 124.5, 124.6, 124.8, 129.1, 130.0, 130.2, 130.6, 133.7, 138.5, 139.0, 154.3, 166.6.; HR-MS: Mass to charge ratio calculated from theoretical formula  $\text{C}_{19}\text{H}_{18}\text{N}_4\text{O}_4\text{S}$   $[\text{M}+\text{H}]^+$  399.1122 and observed 399.1128,  $\Delta\text{ppm}$  1.50.

**2-(3-Hydroxy-4-methyl-5,5-dioxidobenzo[e]pyrazolo[4,3-c][1,2] thiazine-1(4H)-yl)-N-(2-nitrophenyl)acetamide (7e)**

Yellow solid, Yield 334 g (78%), m.p 151-153 °C, FT-IR: 1494 (C=O), 1335, 1155 ( $\text{SO}_2$ ), 1248 (C–N);  $^1\text{H}$  NMR ( $\delta$ ): *N*- $\text{CH}_3$  (linked with thiazine ring) = 3.11 (s, 3H), *N*- $\text{CH}_2$  (linked with pyrazole ring) = 5.00 (s, 2H), N-H (amide) = 10.75 (s, 1H), O-H (linked with pyrazole ring) = 13.23 (s, 1H); Aromatic protons: 7.38 (t, 1H,  $J = 7.8$  Hz), 7.71 (t, 1H,  $J = 7.5$  Hz), 7.77 (t, 1H,  $J = 7.8$  Hz), 7.87 (t, 1H,  $J = 7.4$  Hz), 7.93 (t, 2H,  $J = 6.5$  Hz), 8.10 (t, 2H,  $J = 8.9$  Hz);  $^{13}\text{C}$  NMR ( $\delta$ ): 38.2, 68.0, 109.1, 123.8, 124.4, 124.5, 124.8, 125.5, 125.8, 130.2, 130.3, 130.7, 132.0, 133.8, 135.4, 140.6, 153.9, 167.30; HR-MS: Mass to charge ratio calculated from theoretical formula  $\text{C}_{18}\text{H}_{15}\text{N}_5\text{O}_6\text{S}$   $[\text{M}+\text{H}]^+$  430.0816 and observed 430.0821,  $\Delta\text{ppm}$  1.16.

***N*-Benzyl-2-(3-hydroxy-4-methyl-5,5-dioxidobenzo[e]pyrazolo[4,3-c][1,2]thiazine-1(4*H*)-yl)acetamide (7f)**

White solid, Yield 308 mg (77%), m.p 154-156 °C, FT-IR: 1536 (C=O), 1336, 1153 (SO<sub>2</sub>), 1228 (C–N); <sup>1</sup>H NMR (δ): *N*-CH<sub>3</sub> (linked with thiazine ring) = 3.06 (s, 3H), Ar-CH<sub>2</sub> (benzyl) = 4.35 (d, *J* = 2.9 Hz, 2H), *N*-CH<sub>2</sub> (linked with pyrazole ring) = 4.80 (s, 2H), N-H (amide) = 8.65 (s, 1H), O-H (linked with pyrazole ring) = 13.14 (s, 1H); Aromatic protons: 7.13 – 7.48 (m, 5H), 7.70 (t, 1H, *J* = 7.2 Hz), 7.90 (t, 3H, *J* = 11.4 Hz); <sup>13</sup>C NMR (δ): 38.1, 42.2, 67.9, 109.1, 123.7, 124.5, 124.7, 127.2, 127.6, 128.7, 129.9, 130.2, 130.6, 133.7, 139.7, 154.3, 167.91; HR-MS: Mass to charge ratio calculated from theoretical formula C<sub>19</sub>H<sub>18</sub>N<sub>4</sub>O<sub>4</sub>S [M+H]<sup>+</sup> 399.1122 and observed 399.1131, Δppm 2.25.

**2-(3-Hydroxy-4-methyl-5,5-dioxidobenzo[e]pyrazolo[4,3-c][1,2] thiazine-1(4*H*)-yl)-*N*-(naphthalen-1-yl)acetamide (7g)**

Light orange solid, Yield 351 mg (81%), m.p 161-163 °C, FT-IR: 1502 (C=O), 1338, 1157 (SO<sub>2</sub>), 1252 (C–N); <sup>1</sup>H NMR (δ): *N*-CH<sub>3</sub> (linked with thiazine ring) = 3.11 (s, 3H), *N*-CH<sub>2</sub> (linked with pyrazole ring) = 5.13 (s, 2H), N-H (amide) = 10.22 (s, 1H), O-H (linked with pyrazole ring) = 13.20 (s, 1H); Aromatic protons: 7.50 (d, 1H, *J* = 7.8 Hz), 7.51 – 7.60 (m, 2H), 7.63 – 7.76 (m, 2H), 7.80 (d, 1H, *J* = 8.2 Hz), 7.87 (t, 1H, *J* = 7.6 Hz), 7.95 (d, 3H, *J* = 8.0 Hz), 8.08 – 8.13 (m, 1H); <sup>13</sup>C NMR (δ): 38.1, 68.0, 109.2, 122.6, 123.4, 123.7, 124.5, 124.8, 126.0, 126.2, 126.4, 126.6, 128.6, 130.0, 130.2, 130.7, 133.4, 133.8, 134.2, 143.4, 154.5, 167.6; HR-MS: Mass to charge ratio calculated from theoretical formula C<sub>22</sub>H<sub>18</sub>N<sub>4</sub>O<sub>4</sub>S [M+H]<sup>+</sup> 435.1122 and observed 435.1128, Δppm 1.37.

***N*-(4-Bromophenyl)-2-(3-hydroxy-4-methyl-5,5-dioxidobenzo [e] pyrazolo[4,3-c][1,2] thiazine-1(4*H*)-yl)acetamide (7h)**

Light yellow solid, Yield 378 mg (82%), m.p 185-186 °C, FT-IR: 1538 (C=O), 1349, 1172 (SO<sub>2</sub>), 1270 (C–N); <sup>1</sup>H NMR (δ): *N*-CH<sub>3</sub> (linked with thiazine ring) = 3.08 (s, 3H), *N*-CH<sub>2</sub> (linked with pyrazole ring) = 4.95 (s, 2H), N-H (amide) = 10.40 (s, 1H), O-H (linked with pyrazole ring) = 13.03 (s, 1H); Aromatic protons: 7.50 (d, 2H, *J* = 8.9 Hz), 7.60 (d, 2H, *J* = 8.9 Hz), 7.69 (t, 1H, *J* = 7.5 Hz), 7.85 (t, 1H, *J* = 7.7 Hz), 7.93 (d, 2H, *J* = 9.0 Hz); <sup>13</sup>C NMR (δ): 38.2, 67.8, 109.1, 115.5, 121.7, 123.7, 124.6, 124.8, 130.1,



130.6, 132.1, 133.7, 138.4, 154.3, 166.9; HR-MS: Mass to charge ratio calculated from theoretical formula  $C_{18}H_{15}BrN_4O_4S$   $[M+H]^+$  463.0078 and observed 463.0070,  $\Delta$ ppm - 1.72.

**2-((4-Methyl-1-(2-((4-nitrophenyl)amino)-2-oxoethyl)-5,5-dioxido-1,4-dihydrobenzo[e]pyrazolo[4,3-c][1,2]thiazine-3-yl)oxy)-N-(4-nitrophenyl)acetamide (7i)**

Light orange brown solid, Yield 475 mg (78%), m.p 185-187 °C, FT-IR: 1602, 1504 (C=O), 1328, 1175 (SO<sub>2</sub>), 1253 (C–N); <sup>1</sup>H NMR (δ): *N*-CH<sub>3</sub> (linked with thiazine ring) = 3.08 (s, 3H), *N*-CH<sub>2</sub> (linked with pyrazole ring) = 5.01 (s, 2H), O-CH<sub>2</sub> (linked with pyrazole ring) = 5.31 (s, 2H), N-H (amide) = 10.82 (s, 1H), N-H (amide) = 11.07 (s, 1H); Aromatic protons: 7.82-8.20 (m, 12H); <sup>13</sup>C NMR (δ): 37.9, 55.0, 68.2, 112.6, 119.5, 125.5, 127.6, 129.1, 130.5, 131.8, 133.7, 134.7, 143.3, 145.1, 166.7, 166.7; HR-MS: Mass to charge ratio calculated from theoretical formula  $C_{26}H_{21}N_7O_9S$   $[M+H]^+$  608.1194 and observed 608.1202,  $\Delta$ ppm 1.31.

**N-(4-Methoxyphenyl)-2-(3-(2-((4-methoxyphenyl)amino)-2-oxoethoxy)-4-methyl-5,5-dioxidobenzo[e]pyrazolo[4,3-c][1,2]thiazine-1(4H)-yl)acetamide (7j)**

Light orange solid, Yield 442 mg (77%), m.p 180-182 °C, FT-IR: 1610, 1506 (C=O), 1334, 1170 (SO<sub>2</sub>), 1232 (C–N); <sup>1</sup>H NMR (δ): *N*-CH<sub>3</sub> (linked with thiazine ring) = 3.08 (s, 3H), O-CH<sub>3</sub> (linked with *N*-aryl-acetamide) = 3.72 (s, 6H), *N*-CH<sub>2</sub> (linked with pyrazole ring) = 4.91(s, 2H), O-CH<sub>2</sub> (linked with pyrazole ring) = 5.22 (s, 2H), N-H (amide) = 10.06 (s, 1H), N-H (amide) = 10.40 (s, 1H); Aromatic protons: 6.82-6.93 (m, 4H), 7.49-7.54 (m, 4H), 7.75 (d, 1H, *J* = 7.8 Hz), 7.87 (d, 1H, *J* = 6.8 Hz), 7.98-8.08 (m, 2H); <sup>13</sup>C NMR (δ): 38.0, 54.8, 55.6, 55.6, 67.9, 109.9, 114.3, 114.4, 121.3, 121.6, 124.3, 125.3, 128.4, 130.2, 131.4, 132.0, 133.7, 135.4, 137.1, 153.8, 155.9, 156.0, 165.2, 165.8; HR-MS: Mass to charge ratio calculated from theoretical formula  $C_{28}H_{27}N_5O_7S$   $[M+H]^+$  578.1704 and observed 578.1710,  $\Delta$ ppm 1.03.

**N-(2,3-Dimethylphenyl)-2-(3-(2-((2,3-dimethylphenyl)amino)-2-oxoethoxy)-4-methyl-5,5-dioxidobenzo[e]pyrazolo[4,3-c][1,2]thiazine-1(4H)-yl)acetamide (7k)**

Light pink solid, Yield 482 mg (84%), m.p 198-199 °C, FT-IR: 1670, 1536 (C=O), 1348, 1155 (SO<sub>2</sub>), 1268 (C–N); <sup>1</sup>H NMR (δ): Ar-CH<sub>3</sub> (linked with *N*-aryl-acetamide) = 2.07 (s, 3H), Ar-CH<sub>3</sub> (linked with *N*-aryl-acetamide) = 2.11 (s, 3H), Ar-CH<sub>3</sub> (linked with *N*-aryl-acetamide) = 2.22 (s, 3H), Ar-CH<sub>3</sub> (linked with *N*-aryl-acetamide) = 2.24 (s, 3H), *N*-

CH<sub>3</sub> (linked with thiazine ring) = 3.09 (s, 3H), *N*-CH<sub>2</sub> (linked with pyrazole ring) = 4.96 (s, 2H), *O*-CH<sub>2</sub> (linked with pyrazole ring) = 5.32 (s, 2H), *N*-H (amide) = 9.62 (s, 1H), *N*-H (amide) = 9.86 (s, 1H); Aromatic protons: 7.00 – 7.10 (m, 4H), 7.18 (ddd, 2H, *J* = 14.2, 6.3, 2.8 Hz), 7.75 (t, 1H, *J* = 7.7 Hz), 7.88 (t, 1H, *J* = 7.4 Hz), 8.00 (td, 2H, *J* = 6.3, 3.2 Hz); <sup>13</sup>C NMR (δ): 14.4, 14.5, 20.6, 20.6, 37.9, 54.6, 68.1, 109.9, 123.8, 124.2, 124.3, 125.2, 125.2, 125.6, 125.7, 127.7, 130.2, 131.2, 131.4, 131.5, 132.2, 133.6, 135.8, 135.8, 137.4, 137.6, 153.7, 165.9, 166.6; HR-MS: Mass to charge ratio calculated from theoretical formula C<sub>30</sub>H<sub>31</sub>N<sub>5</sub>O<sub>5</sub>S [M+H]<sup>+</sup> 574.2119 and observed 574.2126, Δppm 1.21.

**2-((4-Methyl-5,5-dioxido-1-(2-oxo-2-(*o*-tolylamino)ethyl)-1,4-dihydrobenzo [e]pyrazolo [4,3-*c*][1,2]thiazine-3-yl)oxy)-*N*-(*o*-tolyl)acetamide (7l)**

Light yellow solid, Yield 438 mg (80%), m.p 202-203 °C, FT-IR: 1610, 1513 (C=O), 1339, 1177 (SO<sub>2</sub>), 1260 (C–N); <sup>1</sup>H NMR (δ): Ar-CH<sub>3</sub> (linked with *N*-aryl-acetamide) = 2.20 (s, 3H), Ar-CH<sub>3</sub> (linked with *N*-aryl-acetamide) = 2.24 (s, 3H), *N*-CH<sub>3</sub> (linked with thiazine ring) = 3.09 (s, 3H), *N*-CH<sub>2</sub> (linked with pyrazole ring) = 4.97 (s, 2H), *O*-CH<sub>2</sub> (linked with pyrazole ring) = 5.33 (s, 2H), *N*-H (amide) = 9.54 (s, 1H), *N*-H (amide) = 9.78 (s, 1H); Aromatic protons: 7.08 – 7.21 (m, 4H), 7.22 (t, 2H, *J* = 5.4 Hz), 7.43 (t, 2H, *J* = 7.1 Hz), 7.75 (t, 1H, *J* = 7.6 Hz), 7.88 (t, 1H, *J* = 7.8 Hz), 7.99 (d, 2H, *J* = 7.9 Hz); <sup>13</sup>C NMR (δ): 18.2, 18.3, 38.0, 54.7, 68.0, 109.9, 124.3, 125.2, 125.3, 125.7, 126.0, 126.4, 126.5, 130.2, 130.8, 130.9, 131.2, 131.4, 132.1, 132.6, 133.6, 136.0, 153.7, 165.9, 166.5; HR-MS: Mass to charge ratio calculated from theoretical formula C<sub>28</sub>H<sub>27</sub>N<sub>5</sub>O<sub>5</sub>S [M+H]<sup>+</sup> 546.1806 and observed 546.181, Δppm 0.91.

**2-((4-Methyl-5,5-dioxido-1-(2-oxo-2-(*p*-tolylamino)ethyl)-1,4-dihydrobenzo [e]pyrazolo [4,3-*c*][1,2]thiazine-3-yl)oxy)-*N*-(*p*-tolyl)acetamide (7m)**

Light yellow solid, Yield 431 mg (79%), m.p 205-207 °C, FT-IR: 1653, 1537 (C=O), 1341, 1180 (SO<sub>2</sub>), 1262 (C–N); <sup>1</sup>H NMR (δ): Ar-CH<sub>3</sub> (linked with *N*-aryl-acetamide) = 2.24 (s, 3H), Ar-CH<sub>3</sub> (linked with *N*-aryl-acetamide) = 2.25 (s, 3H), *N*-CH<sub>3</sub> (linked with thiazine ring) = 3.07 (s, 3H), *N*-CH<sub>2</sub> (linked with pyrazole ring) = 4.92 (s, 2H), *O*-CH<sub>2</sub> (linked with pyrazole ring) = 5.23 (s, 2H), *N*-H (amide) = 10.09 (s, 1H), *N*-H (amide) = 10.40 (s, 1H); Aromatic protons: 7.05 – 7.17 (m, 4H), 7.48 (d, 2H, *J* = 8.4 Hz), 7.74 (t, 1H, *J* = 8.0 Hz), 7.86 (t, 1H, *J* = 7.7 Hz), 7.99 (d, 2H, *J* = 9.1 Hz); <sup>13</sup>C NMR (δ): 21.0, 38.0, 54.8, 67.8, 109.8, 119.7, 119.9, 124.3, 125.2, 125.3, 129.6, 129.7, 130.2, 131.4,

132.9, 133.2, 133.7, 136.4, 136.4, 153.8, 165.5, 166.0; HR-MS: Mass to charge ratio calculated from theoretical formula  $C_{28}H_{27}N_5O_5S$   $[M+H]^+$  546.1806 and observed 546.1812,  $\Delta$ ppm 1.09.

***N*-Cyclohexyl-2-(3-(2-(cyclohexylamino)-2-oxoethoxy)-4-methyl-5,5 dioxido benzo[e] pyrazolo[4,3-c][1,2]thiazine-1(4*H*)-yl)acetamide (7n)**

Light orange solid, Yield 417 mg (79%), m.p 196-198 °C, FT-IR: 1657, 1511 (C=O), 1341, 1152 (SO<sub>2</sub>), 1252 (C–N); <sup>1</sup>H NMR ( $\delta$ ): CH<sub>2</sub> (cyclohexyl) = 1.26 – 1.19 (m, 10H), CH<sub>2</sub> (cyclohexyl) = 1.76 – 1.64 (m, 10H), *N*-CH<sub>3</sub> (linked with thiazine ring) = 3.03 (s, 3H), CH (cyclohexyl) = 3.61 – 3.53 (m, 2H), *N*-CH<sub>2</sub> (linked with pyrazole ring) = 4.66 (s, 2H), O-CH<sub>2</sub> (linked with pyrazole ring) = 4.95 (s, 2H), N-H (amide) = 7.74 (d, *J* = 7.8 Hz, 1H), N-H (amide) = 8.23 (d, *J* = 7.8 Hz, 1H); Aromatic protons: 7.91 (m, 4H); <sup>13</sup>C NMR ( $\delta$ ): 24.9, 25.1, 25.2, 25.6, 26.8, 31.4, 32.8, 37.9, 47.9, 48.3, 54.3, 67.8, 109.7, 124.3, 125.1, 125.2, 130.1, 131.0, 131.4, 133.5, 153.6, 165.8, 166.3; HR-MS: Mass to charge ratio calculated from theoretical formula  $C_{26}H_{35}N_5O_5S$   $[M+H]^+$  530.2432 and observed 529.2340,  $\Delta$ ppm 1.51.

## References

1. Zia-ur-Rehman, M.; Choudary, J. A.; Ahmad, S. *Bull. Korean Chem. Soc.* **2005**, 26 (11), 1771–1775, doi:10.5012/bkcs.2005.26.11.1771.
2. Siddique, W. S.; Ahmad, S.; Ullah, I.; Malik, A.; *J. Chem. Soc. Pak.* **2006**, 28 (6), 583-589.
3. Ahmad, N.; Zia-ur-Rehman, M.; Siddiqui, H. L.; Ullah, M. F.; Parvez, M. *Eur. J. Med. Chem.* **2011**, 46, 2368–2377. doi:10.1016/j.ejmech.2011.03.020.
4. Sattar, A.; Ur Rehman, A.; Abbasi, M. A.; Siddiqui, S. Z.; Rasool, S.; Khalid, H.; Lodhi, M. A.; Khan, F. A. *Turk. J. Chem.* **2018**, 42, 401–417. doi:10.3906/kim-1706-50.
